# Supplementary material for: The PROTAC selectively degrading Bcl-xL represents a novel Hedgehog pathway inhibitor with capacity of combating resistance to Smoothened inhibitors while sparing bone growth
Source: PubMed Central journal article supplement (PMC9691367; doi:10.7150/thno.75421), 2022-10-24
Supplement: thnov12p7476s1.pdf [file thnov12p7476s1.pdf]

The PROTAC selectively degrading Bcl-x<sub>L</sub> represents a novel Hedgehog pathway inhibitor with capacity of combating resistance to Smoothened inhibitors while sparing bone growth

### Supplementary Figure 1

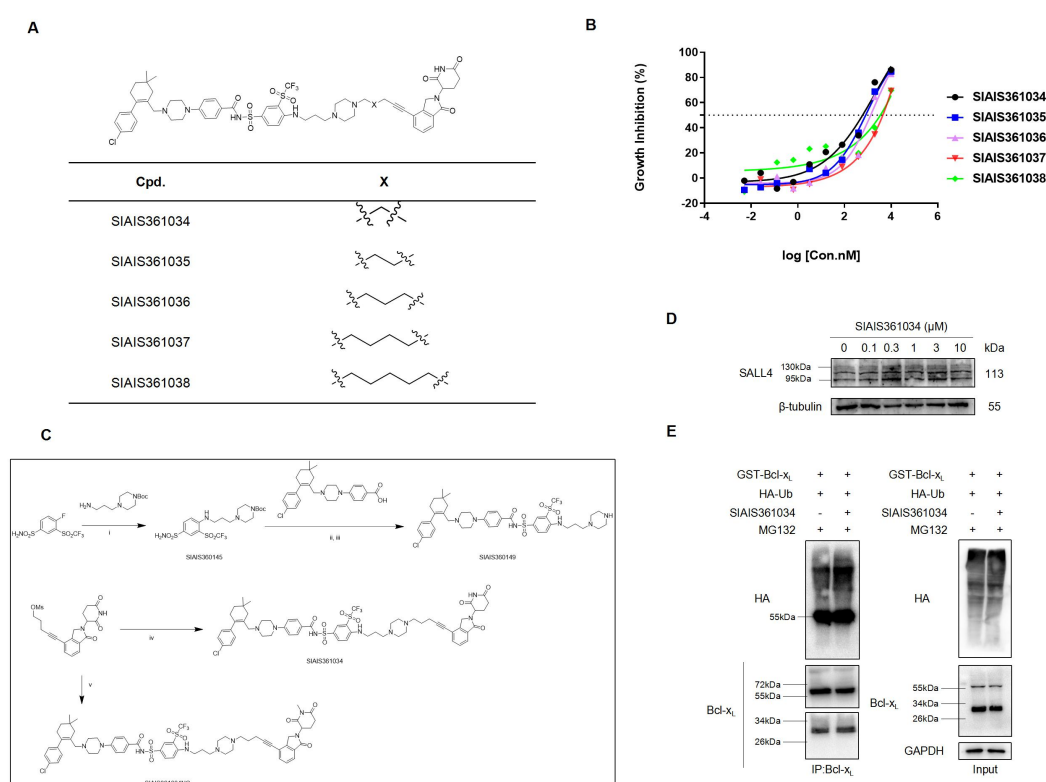

**Figure S1. Optimization of linker length with linear aliphatic chains, synthetic schemes of SIAIS361034 and SIAIS361034NC. (A)** Structures of Bcl-x<sub>L</sub> degraders. **(B)** Cell viability of RS4;11 cells after treatment with increasing concentrations of Bcl-x<sub>L</sub> degraders for 48 h. Data represent mean  $\pm$  SD (n = 3). **(C)** Reagents and conditions: i) DIPEA, DCM, rt; ii) EDCI, DMAP, DCM, rt; iii) TFA, DCM; iv) SIAIS360149, K<sub>2</sub>CO<sub>3</sub>, NaI, DMF, 80 °C; v) NaH, MeI, DMF, 0 °C to rt; then SIAIS360149, K<sub>2</sub>CO<sub>3</sub>, NaI, DMF, 80 °C; DIPEA = *N,N*-diisopropylethylamine; DCM = dichloromethane; EDCI = 1-(3-dimethylaminopropyl)-3-ethylcarbodiimide

hydrochloride; DMAP = 4-dimethylaminopyridine; TFA = trifluoroacetic acid; DMF = *N,N*-dimethylformamide. **(D)** A representative western blot analysis of SALL4 in NIH-3T3 cells after being treated with SIAIS361034 as indicated for 24 h. **(E)** A representative western blot analysis of hemagglutinin (HA), Bcl-x<sub>L</sub>, and GAPDH following GST-Bcl-x<sub>L</sub> immunoprecipitation of protein extracts from 293T cells. Cells were cotransfected as indicated with GST-Bcl-x<sub>L</sub> and HA-tagged ubiquitin (HA-Ub) and then were treated with or without SIAIS361034 (1 μM) and MG132 (10 μM) as indicated for 4 h.

## Supplementary Figure 2

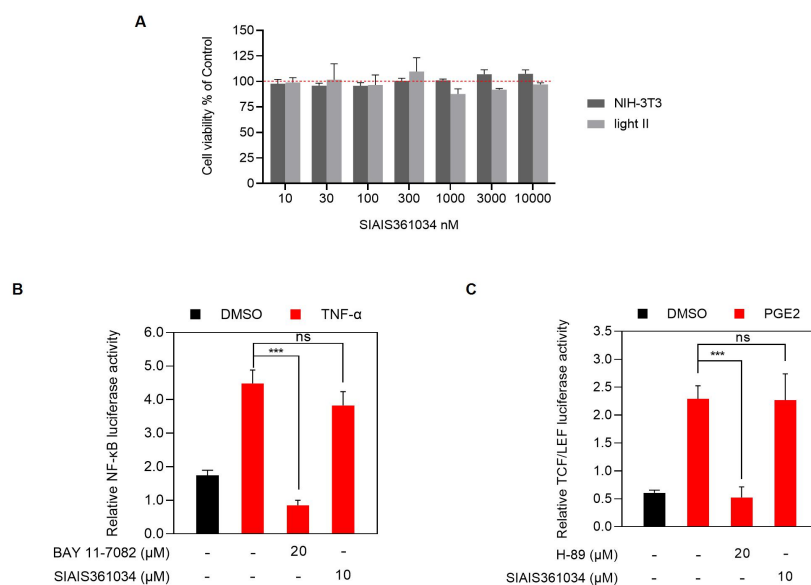

**Figure S2. (A)** Viability of NIH-3T3 cells and light II cells was determined by MTT cytotoxicity assays after incubation with various concentrations of SIAIS361034 as indicated for 72 h. Data represent mean  $\pm$  SD ( $n = 3$ ). **(B)** NF- $\kappa$ B luciferase analysis of the effect of SIAIS361034 on NF- $\kappa$ B signaling pathway in 293T cells. The 293T cells were transfected with NF- $\kappa$ B luciferase reporter and *Renilla*-TK plasmids and then exposed to TNF- $\alpha$  (10 ng/mL) with BAY 11-872 (20  $\mu$ M) and SIAIS361034 (10  $\mu$ M) for 6 h. Data represent mean  $\pm$  SD ( $n = 3$ ). **(C)** TCF/LEF luciferase analysis of the effect of SIAIS361034 on Wnt signaling pathway in LS174T cells. The LS174T cells were transfected with TCF/LEF luciferase reporter and *Renilla*-TK plasmids and then exposed to PGE2 (1  $\mu$ M) with H-89 (20  $\mu$ M) and SIAIS361034 (10  $\mu$ M) for 24 h. Data represent mean  $\pm$  SD ( $n = 3$ ).

### Supplementary Figure 3

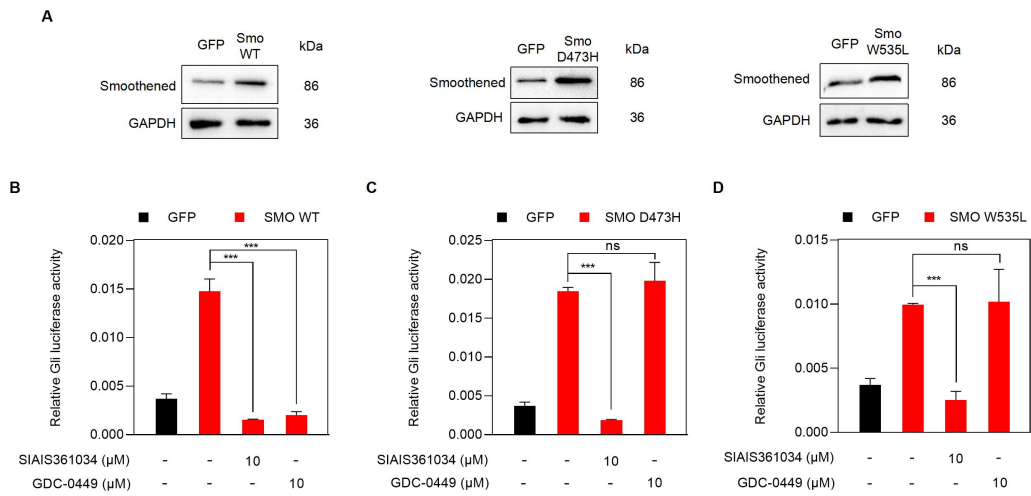

**Figure S3. (A)** A representative western blot analysis of Smo in light II cells after transfected with Smo-WT, Smo-D473H, Smo-W535L, and GFP plasmids. GAPDH was used as a protein loading control in western blot analysis. **(B-D)** The effect of SIAIS361034 (10  $\mu$ M) and GDC-0449 (10  $\mu$ M) on the Gli-luciferase activity initiated by ectopic expression of Smo-WT, Smo-D473H, and Smo-W535L plasmids, respectively. Data represent mean  $\pm$  SD (n = 3).

## Supplementary Figure 4

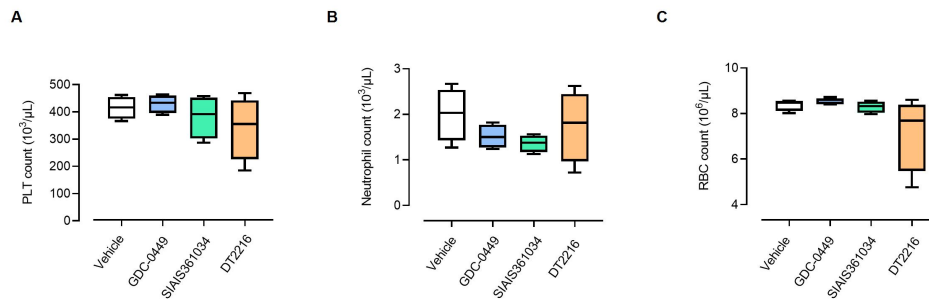

**Figure S4.** Numeration of platelets (A), neutrophils (B), and red blood cells (C) of 6-week-old mice after various treatments from P12 to P16. Data represent mean  $\pm$  SD (n = 4).

**Supplementary Table 1. Mouse PK parameters following IV/IP/PO Administration with SIAIS361034.**

| IV                   | Dose Level | T <sub>1/2</sub> | T <sub>max</sub> | C <sub>max</sub> | AUC <sub>(0-t)</sub> | AUC <sub>(0-∞)</sub> | MRT <sub>(0-t)</sub> | MRT <sub>(0-∞)</sub> | C <sub>0</sub> | V <sub>ss</sub> | V <sub>z</sub> | Cl      |      |
|----------------------|------------|------------------|------------------|------------------|----------------------|----------------------|----------------------|----------------------|----------------|-----------------|----------------|---------|------|
| Administration Route | mg/kg      | h                | h                | ng/mL            | h*ng/mL              | h*ng/mL              | h                    | h                    | ng/mL          | mL/kg           | mL/kg          | mL/h/kg |      |
| Animal No.           |            |                  |                  |                  |                      |                      |                      |                      |                |                 |                |         |      |
| Mouse 1              | IV         | 2.00             | 1.79             | 0.083            | 10300                | 3193                 | 3205                 | 0.22                 | 0.26           | 34215           | 163            | 1609    | 624  |
| Mouse 2              | IV         | 2.00             | 6.38             | 0.083            | 17900                | 6203                 | 6222                 | 0.30                 | 0.40           | 79513           | 130            | 2957    | 321  |
| Mouse 3              | IV         | 2.00             | 2.29             | 0.083            | 13200                | 4263                 | 4305                 | 0.31                 | 0.42           | 43287           | 193            | 1535    | 465  |
| n                    |            | 3.00             | 3.00             | 3.00             | 3.00                 | 3.00                 | 3.00                 | 3.00                 | 3.00           | 3.00            | 3.00           | 3.00    | 3.00 |
| Mean                 |            | 2.00             | 3.49             | 0.083            | 13800                | 4553                 | 4577                 | 0.28                 | 0.36           | 52339           | 162            | 2034    | 470  |
| SD                   |            | 0.000            | 2.52             | 0.00             | 3835                 | 1526                 | 1527                 | 0.05                 | 0.09           | 23967           | 32             | 801     | 151  |

| IP         | Administration Route | Dose Level | T <sub>1/2</sub> | T <sub>max</sub> | C <sub>max</sub> | AUC <sub>(0-t)</sub> | AUC <sub>(0-∞)</sub> | MRT <sub>(0-t)</sub> | MRT <sub>(0-∞)</sub> | F    |
|------------|----------------------|------------|------------------|------------------|------------------|----------------------|----------------------|----------------------|----------------------|------|
| Animal No. |                      | mg/kg      | h                | h                | ng/mL            | h*ng/mL              | h*ng/mL              | h                    | h                    | %    |
| Mouse 1    | IP                   | 10         | 5.94             | 1.00             | 7630             | 15533                | 16333                | 3.84                 | 5.25                 | 71.4 |
| Mouse 2    | IP                   | 10         | 6.44             | 0.50             | 9700             | 20871                | 22061                | 5.16                 | 6.68                 | 96.4 |
| Mouse 3    | IP                   | 10         | 5.23             | 0.50             | 4920             | 15558                | 16141                | 4.24                 | 5.22                 | 70.5 |
| n          |                      | 3.00       | 3.00             | 3.00             | 3.00             | 3.00                 | 3.00                 | 3.00                 | 3.00                 | 3.00 |
| Mean       |                      | 10.0       | 5.87             | 0.67             | 7417             | 17321                | 18178                | 4.41                 | 5.72                 | 79.4 |
| SD         |                      | 0.00       | 0.61             | 0.29             | 2397             | 3075                 | 3364                 | 0.68                 | 0.83                 | 14.7 |

| PO         | Administration Route | Dose Level | T <sub>1/2</sub> | T <sub>max</sub> | C <sub>max</sub> | AUC <sub>(0-t)</sub> | AUC <sub>(0-∞)</sub> | MRT <sub>(0-t)</sub> | MRT <sub>(0-∞)</sub> | F     |
|------------|----------------------|------------|------------------|------------------|------------------|----------------------|----------------------|----------------------|----------------------|-------|
| Animal No. |                      | mg/kg      | h                | h                | ng/mL            | h*ng/mL              | h*ng/mL              | h                    | h                    | %     |
| Mouse 1    | PO                   | 10         | 8.98             | 1.00             | 50.9             | 265                  | 305                  | 6.29                 | 10.30                | 1.33  |
| Mouse 2    | PO                   | 10         | NA               | 2.00             | 54.9             | 213                  | NA                   | 2.88                 | NA                   | NA    |
| Mouse 3    | PO                   | 10         | 2.39             | 1.00             | 49.1             | 101                  | 111                  | 2.01                 | 2.82                 | 0.484 |
| n          |                      | 3.00       | 3.00             | 3.00             | 3.00             | 3.00                 | 3.00                 | 3.00                 | 3.00                 | 3.00  |
| Mean       |                      | 10.0       | 5.68             | 1.33             | 51.6             | 193                  | 208                  | 3.73                 | 6.56                 | NA    |
| SD         |                      | 0.00       | 4.66             | 0.58             | 2.97             | 83.7                 | 137                  | 2.27                 | 5.28                 | 0.60  |
