# Supplementary material for: The PROTAC selectively degrading Bcl-xL represents a novel Hedgehog pathway inhibitor with capacity of combating resistance to Smoothened inhibitors while sparing bone growth
Source: PubMed Central journal article supplement (PMC9691367; doi:10.7150/thno.75421), 2022-10-24
Supplement: thnov12p7476s3.pdf [file thnov12p7476s3.pdf]

## Supplementary data 2

Full sequence information of Smo mutants plasmids are provided below.

Smo D473H:

CAGAGCTCTCTGGCTAACTAGAGAACCCACTGCTTACTGGCTTATCGAAATTAATACGA  
CTCACTATAGGGAGACCCAAGCTGGCTAGCGTTTAACTTAAGCTTGGTACCGAGCTC  
GGATCCGCCACCATGGCCGCTGCCC GCCAGCGCGGGGGCCGGAGCTCCCGCTCCTG  
GGGCTGCTGCTGCTGCTGCTGCTGGGGGACCCGGGCGGGGGGCGGCCTCGAGCGGG  
AACGCGACCGGGCCTGGGCCTCGGAGCGCGGGCGGGAGCGCGAGGAGGAGCGCGGC  
GGTACTGGCCCTCCGCCGCCGCTGAGCCACTGCGGCCGGGCTGCCCCCTGCGAGCC  
GCTGCGCTACAACGTGTGCCTGGGCTCGGTGCTGCCCTACGGGGCCACCTCCACTG  
CTGGCCGGAGACTCGGACTCCCAGGAGGAAGCGCACGGCAAGCTCGTGCTCTGGTCG  
GGCCTCCGGAATGCCCCCGCTGCTGGGCAGTGATCCAGCCCCTGCTGTGTGCCGTAT  
ACATGCCCAAGTGTGAGAATGACCGGGTGGAGCTGCCAGCCGTACCCTCTGCCAGGC  
CACCCGAGGCCCTGTGCCATCGTGGAGAGGGAGCGGGGCTGGCCTGACTTCCTGCG  
CTGCACTCCTGACCGCTTCCCTGAAGGCTGCACGAATGAGGTGCAGAACATCAAGTTC  
AACAGTTCAGGCCAGTGCGAAGTGCCCTTGGTTCCGACAGACAACCCCAAGAGCTGG  
TACGAGGACGTGGAGGGCTGCGGCATCCAGTGCCAGAACCCGCTCTTCACAGAGGCT  
GAGCACCAGGACATGCACAGCTACATCGCGGCCTTCGGGGCCGTCACGGGCCTCTGCA  
CGCTCTTCACCCTGGCCACATTCGTGGCTGACTGGCGGAACTCGAATCGCTACCCTGCT  
GTTATTCTCTTCTACGTCAATGCGTGCTTCTTTGTGGGCAGCATTGGCTGGCTGGCCCA  
GTTTCATGGATGGTGCCCGCCGAGAGATCGTCTGCCGTGCAGATGGCACCATGAGGCTT  
GGGGAGCCCACCTCCAATGAGACTCTGTCCCTGCGTCATCATCTTGTGCATCGTGTACTA  
CGCCCTGATGGCTGGTGTGGTTTGGTTTGTGGTCTCACCTATGCCTGGCACACTTCCT  
TCAAAGCCCTGGGCACCACCTACCAGCCTCTCTCGGGCAAGACCTCCTACTTCCACCT  
GCTCACCTGGTCACTCCCCTTTGTCCCTACTGTGGCAATCCTTGCTGTGGCGCAGGTGG  
ATGGGGACTCTGTGAGTGGCATTGTTTTGTGGGCTACAAGA ACTACCGATAACCGTGCG  
GGCTTCGTGCTGGCCCCAATCGGCCTGGTGCTCATCGTGGGAGGCTACTTCCTCATCCG  
AGGAGTCATGACTCTGTTCTCCATCAAGAGCAACCACCCCGGGCTGCTGAGTGAGAA  
GGCTGCCAGCAAGATCAACGAGACCATGCTGCGCCTGGGCATTTTTGGCTTCCTGGCC  
TTTGGCTTTGTGCTCATTACCTTCAGCTGCCACTTCTACCCTTCTTCAACCAGGCTGA  
GTGGGAGCGCAGCTTCCGGGACTATGTGCTATGTCAGGCCAATGTGACCATCGGGCTG  
CCCACCAAGCAGCCCATCCCTGACTGTGAGATCAAGAATCGCCCAGCCTTCTGGTGG  
AGAAGATCAACCTGTTTGCCATGTTTGGAACTGGCATCGCCATGAGCACCTGGGTCTG  
GACCAAGGCCACGCTGCTCATCTGGAGGCGTACCTGGTGCAGGTTGACTGGGCAGAG  
TGACGATGAGCCAAAGCGGATCAAGAAGAGCAAGATGATTGCCAAGGCCTTCTCTAA  
GCGGCACGAGCTCCTGCAGAACCCAGGCCAGGAGCTGTCCTTCAGCATGCACACTGT  
GTCCACGACGGGCCCCTGGCGGGCTTGGCCTTTGACCTCAATGAGCCCTCAGCTGAT  
GTCTCCTCTGCCTGGGCCAGCATGTCACCAAGATGGTGGCTCGGAGAGGAGCCATAC  
TGCCCCAGGATATTTCTGTACCCCTGTGGCAACTCCAGTGCCCCAGAGGAACAAGC  
CAACCTGTGGCTGGTTGAGGCAGAGATCTCCCAGAGCTGCAGAAGCGCCTGGGCCG  
GAAGAAGAAGAGGAGGAAGAGGAAGAAGGAGGTGTGCCCGCTGGCGCCGCCCCCTG  
AGTTTACCCCCCTGCCCTGCCCCAGTACCATTCTCGACTGCCTCAGCTGCCCCGG  
CAGAAATGCCTGGTGGCTGCAGGTGCCTGGGGAGCTGGGGACTCTTGCCGACAGGGA

GCGTGGACCCTGGTCTCCAACCCATTCTGCCAGAGCCCAGTCCCCCTCAGGATCCAT  
TTCTGCCAGTGCACCGGCCCGTGGCATGGGCTCATGGCCGCCGACAGGGCCTGGG  
GCCTATTACTIONCCGCACCAACCTGATGGACACAGAACTCATGGATGCAGACTCGGAC  
TTCTGACTCGAGTCT

Smo W535L:

TGCGATGGTGAATAGCAGAGCTCGTTTAGTGACCGTCAGAATTTTGTAAATACGACTCA  
CTATAGGGCGGCCGGAATTCGTCGACTGGATCCGGTACCGAGGAGATCTGCCGCCGC  
GATCGCCATGGCCGCTGCCCCGCCAGCGCGGGGGCCGGAGCTCCCGCTCCTGGGGCT  
GCTGCTGCTGCTGCTGCTGGGGGACCCGGGCCGGGGGGCGGCCTCGAGCGGGAACGC  
GACCGGGCCTGGGCCTCGGAGCGCGGGCGGGAGCGCGAGGAGGAGCGCGGCGGTGA  
CTGGCCCTCCGCCGCCGCTGAGCCACTGCGGCCGGGCTGCCCCCTGCGAGCCGCTGC  
GCTACAACGTGTGCCTGGGCTCGGTGCTGCCCTACGGGGCCACCTCCACACTGCTGGC  
CGGAGACTCGGACTCCAGGAGGAAGCGCACGGCAAGCTCGTGCTCTGGTCCGGCCT  
CCGAATGCCCCCGCTGCTGGGCAGTGATCCAGCCCCTGCTGTGTGCCGTATACATGC  
CCAAGTGTGAGAATGACCGGGTGGAGCTGCCAGCCGTACCCTCTGCCAGGCCACCC  
GAGGCCCTGTGCCATCGTGGAGAGGGAGCGGGGCTGGCCTGACTTCCTGCGCTGCA  
CTCCTGACCCTCCCTGAAGGCTGCACGAATGAGGTGCAGAACATCAAGTTCAACAG  
TTCAGGCCAGTGCGAAGTGCCCTTGGTTCGGACAGACAACCCCAAGAGCTGGTACGA  
GGACGTGGAGGGCTGCGGCATCCAGTGCCAGAACCCGCTCTTCACAGAGGCTGAGCA  
CCAGGACATGCACAGCTACATCGCGGCCTTCGGGGCCGTACGGGCCTCTGCACGCTC  
TTCACCCTGGCCACATTCGTGGCTGACTGGCGGAACTCGAATCGCTACCCTGCTGTTAT  
TCTCTTCTACGTCAATGCGTGCTTCTTTGTGGGCAGCATTGGCTGGCTGGCCCAGTTCA  
TGGATGGTGCCCGCCGAGAGATCGTCTGCCGTGCAGATGGCACCATGAGGCTTGGGGA  
GCCACCTCCAATGAGACTCTGTCCTGCGTCATCATCTTTGTCATCGTGTACTACGCCCT  
GATGGCTGGTGTGGTTTTGGTTTTGTGGTCCCTACCTATGCCTGGCACACTTCCTTCAAAG  
CCCTGGGCACCACCTACCAGCCTCTCTCGGGCAAGACCTCCTACTTCCACCTGCTCAC  
CTGGTCACTCCCTTTGTCTCACTGTGGCAATCCTTGTGTGGCGCAGGTGGATGGG  
GACTCTGTGAGTGGCATTGTTTTGTGGGCTACAAGAACTACCGATACCGTGCGGGCTT  
CGTGCTGGCCCCAATCGGCCTGGTGTCTCATCGTGGGAGGCTACTTCCTCATCCGAGGA  
GTCATGACTCTGTTCTCCATCAAGAGCAACCACCCGGGCTGCTGAGTGAGAAGGCTG  
CCAGCAAGATCAACGAGACCATGCTGCGCCTGGGCATTTTTGGCTTCCTGGCCTTTGG  
CTTTGTGCTCATTACCTCAGCTGCCACTTCTACGACTTCTTCAACCAGGCTGAGTGGG  
AGCGCAGCTTCCGGGACTATGTGCTATGTCAGGCCAATGTGACCATCGGGCTGCCAC  
CAAGCAGCCCATCCCTGACTGTGAGATCAAGAATCGCCCAGCCTTCTGGTGGAGAAG  
ATCAACCTGTTTGCCATGTTTGGAACTGGCATCGCCATGAGCACCCCTCGTCTGGACCAA  
GGCCACGCTGCTCATCTGGAGGCGTACCTGGTGCAGGTTGACTGGGCAGAGTGACGAT  
GAGCCAAAGCGGATCAAGAAGAGCAAGATGATTGCCAAGGCCTTCTCTAAGCGGCAC  
GAGCTCCTGCAGAACCAGGCCAGGAGCTGTCCTTCAGCATGCACACTGTGTCCCACG  
ACGGGCCCCGTGGCGGGCTTGGCCTTTGACCTCAATGAGCCCTCAGCTGATGTCTCCTC  
TGCCTGGGCCCAGCATGTCACCAAGATGGTGGCTCGGAGAGGAGCCATACTGCCCCAG  
GATATTTCTGTCACCCCTGTGGCAACTCCAGTGCCCCAGAGGAACAAGCCAACCTGT  
GGCTGGTTGAGGCAGAGATCTCCCCAGAGCTGCAGAAGCGCCTGGGCCGGAAGAAGA  
AGAGGAGGAAGAGGAAGAAGGAGGTGTGCCCGCTGGCGCCGCCCTGAGCTTCAC

CCCCCTGCCCTGCCCCAGTACCATTCTCGACTGCCTCAGCTGCCCCGGCAGAAAT  
GCCTGGTGGCTGCAGGTGCCTGGGGAGCTGGGGACTCTTGCCGACAGGGAGCGTGGA  
CCCTGGTCTCCAACCCATTCTGCCAGAGCCCAGTCCCCCTCAGGATCCATTTCTGCC  
AGTGACCCGGCCCCCGTGGCATGGGCTCATGGCCGCGACAGGGCCTGGGGCCTATTC  
ACTCCCGCACCAACCTGATGGACACAGAACTCATGGATGCAGACTCGGACTTCACGCG  
TACGCGGCCGCTCGAGCAGAACTCATCTCAGAAGAGGATCTGGCAGCAAATGATATC  
CTGGATTACAAGGATGACGACGATAAGGTTTAAACGGCCGGCCGCGGTTCATAGCTGTT  
TCCTGAACAGATCCCGGGTGGCATCCCTGTGACCCCTCCCAGTGCCTCTCTGGCCCT  
GGAAGTTGCCACTCCAGTGCCACCAGCCTGTCCTAATAAATAGTCAACGT

Smo H231R:

CTAGAGAACCCACTGCTTACTGGCTTATCGAAATTAATACGACTCACTATAGGGAGACC  
CAAGCTGGCTAGCGTTTAACTTAAGCTTGGTACCGAGCTCGGATCCGCCACCATGGC  
CGCTGCCCGCCAGCGCGGGGGCCGGAGCTCCCGCTCCTGGGGCTGCTGCTGCTGCT  
GCTGCTGGGGACCCGGGCCGGGGGGCGCCTCGAGCGGGAACGCGACCGGGCCTG  
GGCCTCGGAGCGCGGGGCGGAGCGCGAGGAGGAGCGCGGCGGTGACTGGCCCTCCG  
CCGCCGCTGAGCCACTGCGGCCGGGCTGCCCCCTGCGAGCCGCTGCGCTACAACGTGT  
GCCTGGGCTCGGTGCTGCCCTACGGGGCCACCTCCACACTGCTGGCCGGAGACTCGG  
ACTCCCAGGAGGAAGCGCACGGCAAGCTCGTGCTCTGGTCGGGCCTCCGGAATGCCC  
CCCGCTGCTGGGCAGTGATCCAGCCCCTGCTGTGTGCCGTATACATGCCCAAGTGTGA  
GAATGACCGGGTGGAGCTGCCAGCCGTACCCTCTGCCAGGCCACCCGAGGCCCTGT  
GCCATCGTGGAGAGGGAGCGGGGCTGGCCTGACTTCCTGCGCTGCACTCCTGACCGCT  
TCCCTGAAGGCTGCACGAATGAGGTGCAGAACATCAAGTTCAACAGTTCAGGCCAGT  
GCGAAGTGCCCTTGGTTCGGACAGACAACCCCAAGAGCTGGTACGAGGACGTGGAGG  
GCTGCGGCATCCAGTGCCAGAACCCGCTCTTCACAGAGGCTGAGCACCAGGACATGC  
GCAGCTACATCGCGGCCTTCGGGGCCGTCACGGGCCTCTGCACGCTCTTCACCCTGGC  
CACATTCGTGGCTGACTGGCGGAACCTCGAATCGCTACCCTGCTGTTATTCTTTCTACG  
TCAATGCGTGCTTCTTTGTGGGCAGCATTGGCTGGCTGGCCCAGTTCATGGATGGTGCC  
CGCCGAGAGATCGTCTGCCGTGCAGATGGCACCATGAGGCTTGGGGAGCCCACCTCCA  
ATGAGACTCTGTCCTGCGTCATCATCTTTGTTCATCGTGTACTACGCCCTGATGGCTGGTG  
TGGTTTGGTTTGTGGTCTCACCTATGCCTGGCACACTTCCTTCAAAGCCCTGGGCACC  
ACCTACCAGCCTCTCTCGGGCAAGACCTCCTACTTCCACCTGCTCACCTGGTCACTCCC  
CTTTGTCTCACTGTGGCAATCCTTGTGTGGCGCAGGTGGATGGGGACTCTGTGAGT  
GGCATTGTGTTTGTGGGCTACAAGAACTACCGATAACCGTGCGGGCTTCGTGCTGGCCCC  
AATCGGCCTGGTGCTCATCGTGGGAGGCTACTTCCTCATCCGAGGAGTCATGACTCTGT  
TCTCCATCAAGAGCAACCACCCCGGGCTGCTGAGTGAGAAGGCTGCCAGCAAGATCA  
ACGAGACCATGCTGCGCCTGGGCATTTTTGGCTTCTGGCCTTTGGCTTTGTGCTCATT  
ACCTTACAGCTGCCACTTCTACGACTTCTTCAACCAGGCTGAGTGGGAGCGCAGCTTCC  
GGACTATGTGCTATGTCAGGCCAATGTGACCATCGGGCTGCCACCAAGCAGCCCAT  
CCCTGACTGTGAGATCAAGAATCGCCGAGCCTTCTGGTGGAGAAGATCAACCTGTTT  
GCCATGTTTGGAACTGGCATCGCCATGAGCACCTGGGTCTGGACCAAGGCCACGCTGC  
TCATCTGGAGGCGTACCTGGTGCAGGTTGACTGGGCAGAGTGACGATGAGCCAAAGC  
GGATCAAGAAGAGCAAGATGATTGCCAAGGCCTTCTCTAAGCGGCACGAGCTCCTGCA  
GAACCCAGGCCAGGAGCTGTCCTTCAGCATGCACACTGTGTCCCACGACGGGCCCGT

GGCGGGCTTGGCCTTTGACCTCAATGAGCCCTCAGCTGATGTCTCCTCTGCCTGGGCC  
CAGCATGTCACCAAGATGGTGGCTCGGAGAGGAGCCATACTGCCCCAGGATATTTCTG  
TCACCCCTGTGGCAACTCCAGTGCCCCCAGAGGAACAAGCCAACCTGTGGCTGGTTG  
AGGCAGAGATCTCCCAGAGCTGCAGAAGCGCCTGGGCCGGAAGAAGAAGAGGAGG  
AAGAGGAAGAAGGAGGTGTGCCCGCTGGCGCCGCCCTGAGCTTCACCCCCCTGCC  
CCTGCCCCAGTACCATTCTCGACTGCCTCAGCTGCCCCGGCAGAAATGCCTGGTGG  
CTGCAGGTGCCTGGGGAGCTGGGGACTCTTGCCGACAGGGAGCGTGGACCCTGGTCT  
CCAACCCATTCTGCCAGAGCCCAGTCCCCCTCAGGATCCATTTCTGCCAGTGCACC  
GGCCCCGTGGCATGGGCTCATGGCCGCCGACAGGGCCTGGGGCCTATTCCTCCCGC  
ACCAACCTGATGGACACAGAACTCATGGATGCAGACTCGGACTTCGAACAAAACTC  
ATCTCAGAAGAGGATCTGGACTACAAGGATGACGATGACAAGGATTACAAAGACGAC  
GATGATAAGGACTATAAGGATGATGACGACAAATAATCTAGAGGGCCCGTTTAAACCCG  
CTGATCAGCCTCGACTGTGCCTTCTAGTTGCCAGCCATCTGTTGTT

Smo W281C:

CTAGAGAACCCACTGCTTACTGGCTTATCGAAATTAATACGACTCACTATAGGGAGACC  
CAAGCTGGCTAGCGTTTAAACTTAAGCTTGGTACCGAGCTCGGATCCGCCACCATGGC  
CGCTGCCCCGCCAGCGCGGGGGCCGGAGCTCCCGCTCCTGGGGCTGCTGCTGCTGCT  
GCTGCTGGGGGACCCGGGCCGGGGGGCGGCCTCGAGCGGGAACGCGACCCGGGCCTG  
GGCCTCGGAGCGCGGGCGGGAGCGCGAGGAGGAGCGCGGCGGTGACTGGCCCTCCG  
CCGCCGCTGAGCCACTGCGGCCGGGCTGCCCCCTGCGAGCCGCTGCGCTACAACGTGT  
GCCTGGGCTCGGTGCTGCCCTACGGGGCCACCTCCACACTGCTGGCCGGAGACTCGG  
ACTCCCAGGAGGAAGCGCACGGCAAGCTCGTGCTCTGGTCGGGCCTCCGGAATGCC  
CCCGCTGCTGGGCAGTGATCCAGCCCCTGCTGTGTGCCGTATACATGCCCAAGTGTGA  
GAATGACCGGGTGGAGCTGCCAGCCGTACCCTCTGCCAGGCCACCCGAGGCCCTGT  
GCCATCGTGGAGAGGGAGCGGGGCTGGCCTGACTTCCTGCGCTGCACTCCTGACCGCT  
TCCCTGAAGGCTGCACGAATGAGGTGCAGAACATCAAGTTCAACAGTTCAGGCCAGT  
GCGAAGTGCCCTTGGTTTCGGACAGACAACCCCAAGAGCTGGTACGAGGACGTGGAGG  
GCTGCGGCATCCAGTGCCAGAACCCGCTCTTACAGAGGCTGAGCACCAGGACATGC  
ACAGCTACATCGCGGCCTTCGGGGCCGTCACGGGCCTCTGCACGCTCTTACCCTGGC  
CACATTCGTGGCTGACTGGCGGAACTCGAATCGCTACCCTGCTGTTATTCTTCTTACG  
TCAATGCGTGCTTCTTTGTGGGCAGCATTGGCTGCCTGGCCCAGTTCATGGATGGTGCC  
CGCCGAGAGATCGTCTGCCGTGCAGATGGCACCATGAGGCTTGGGGAGCCCACCTCCA  
ATGAGACTCTGTCTGCGTCATCATCTTTGTGCATCGTGTACTACGCCCTGATGGCTGGTG  
TGTTTTGGTTTGTGGTCCCTCACCTATGCCTGGCACACTTCCTTCAAAGCCCTGGGCACC  
ACCTACCAGCCTCTCTCGGGCAAGACCTCCTACTTCCACCTGCTCACCTGGTCACTCCC  
CTTTGTCTCACTGTGGCAATCCTTGTGTGGCGCAGGTGGATGGGGACTCTGTGAGT  
GGCATTGTTTTGTGGGCTACAAGAACTACCGATAACCGTGCGGGCTTCGTGCTGGCCCC  
AATCGGCCTGGTGCTCATCGTGGGAGGCTACTTCCTCATCCGAGGAGTCATGACTCTGT  
TCTCCATCAAGAGCAACCACCCCGGGCTGCTGAGTGAGAAGGCTGCCAGCAAGATCA  
ACGAGACCATGCTGCGCCTGGGCATTTTTGGCTTCTGGCCTTTGGCTTTGTGCTCATT  
ACCTTCAGCTGCCACTTCTACGACTTCTTCAACCAGGCTGAGTGGGAGCGCAGCTTCC  
GGGACTATGTGCTATGTCAGGCCAATGTGACCATCGGGCTGCCACCAAGCAGCCCAT  
CCCTGACTGTGAGATCAAGAATCGCCGAGCCTTCTGGTGGAGAAGATCAACCTGTTT

GCCATGTTTGGAACTGGCATCGCCATGAGCACCTGGGTCTGGACCAAGGCCACGCTGC  
TCATCTGGAGGCGTACCTGGTGCAGGTTGACTGGGCAGAGTGACGATGAGCCAAAGC  
GGATCAAGAAGAGCAAGATGATTGCCAAGGCCTTCTCTAAGCGGCACGAGCTCCTGCA  
GAACCCAGGCCAGGAGCTGTCCTTCAGCATGCACACTGTGTCCCACGACGGGCCCGT  
GGCGGGCTTGGCCTTTGACCTCAATGAGCCCTCAGCTGATGTCTCCTCTGCCTGGGCC  
CAGCATGTCACCAAGATGGTGGCTCGGAGAGGAGCCATACTGCCCCAGGATATTTCTG  
TCACCCCTGTGGCAACTCCAGTGCCCCCAGAGGAACAAGCCAACCTGTGGCTGGTTG  
AGGCAGAGATCTCCCCAGAGCTGCAGAAGCGCCTGGGCCGGAAGAAGAAGAGGAGG  
AAGAGGAAGAAGGAGGTGTGCCCGCTGGCGCCGCCCTGAGCTTCACCCCCCTGCC  
CCTGCCCCCAGTACCATTCTCGACTGCCTCAGCTGCCCGGCAGAAATGCCTGGTGG  
CTGCAGGTGCCTGGGGAGCTGGGGACTCTTGCCGACAGGGAGCGTGGACCCTGGTCT  
CCAACCCATTCTGCCCAGAGCCCAGTCCCCCTCAGGATCCATTTCTGCCCAGTGCACC  
GGCCCCCGTGGCATGGGCTCATGGCCGCCGACAGGGCCTGGGGCCTATTCCTCCCGC  
ACCAACCTGATGGACACAGAACTCATGGATGCAGACTCGGACTTCGAACAAAAACTC  
ATCTCAGAAGAGGATCTGGACTACAAGGATGACGATGACAAGGATTACAAAGACGAC  
GATGATAAGGACTATAAGGATGATGACGACAAATAATCTAGAGGGCCCGTTTAAACCCG  
CTGATCAGCCTCGACTGTGCCTTCTAGTTGCCAGCCATCTGTTGTT

Smo L412F:

CTAGAGAACCCACTGCTTACTGGCTTATCGAAATTAATACGACTCACTATAGGGAGACC  
CAAGCTGGCTAGCGTTTAAACTTAAGCTTGGTACCGAGCTCGGATCCGCCACCATGGC  
CGCTGCCCCGCCAGCGCGGGGGCCGGAGCTCCCGCTCCTGGGGCTGCTGCTGCTGCT  
GCTGCTGGGGGACCCGGGCCGGGGGGCGGCCTCGAGCGGGAACGCGACCGGGCCTG  
GGCCTCGGAGCGCGGGCGGGAGCGCGAGGAGGAGCGCGGCGGTGACTGGCCCTCCG  
CCGCCGCTGAGCCACTGCGGCCGGGCTGCCCCCTGCGAGCCGCTGCGCTACAACGTGT  
GCCTGGGCTCGGTGCTGCCCTACGGGGCCACCTCCACACTGCTGGCCGGAGACTCGG  
ACTCCCAGGAGGAAGCGCACGGCAAGCTCGTGCTCTGGTCGGGCCTCCGGAATGCC  
CCCGCTGCTGGGCAGTGATCCAGCCCCTGCTGTGTGCCGTATACATGCCCAAGTGTGA  
GAATGACCGGGTGGAGCTGCCAGCCGTACCCTCTGCCAGGCCACCCGAGGCCCTGT  
GCCATCGTGGAGAGGGAGCGGGGCTGGCCTGACTTCCTGCGCTGCACTCCTGACCGCT  
TCCCTGAAGGCTGCACGAATGAGGTGCAGAACATCAAGTTCAACAGTTCAGGCCAGT  
GCGAAGTGCCCTTGGTTCGGACAGACAACCCCAAGAGCTGGTACGAGGACGTGGAGG  
GCTGCGGCATCCAGTGCCAGAACCCGCTCTTCACAGAGGCTGAGCACCAGGACATGC  
ACAGCTACATCGCGGCCTTCGGGGCCGTCACGGGCCTCTGCACGCTCTTCACCCTGGC  
CACATTCGTGGCTGACTGGCGGAACTCGAATCGCTACCCTGCTGTTATTCTTCTTACG  
TCAATGCGTGCTTCTTTGTGGGCAGCATTGGCTGGCTGGCCCAGTTCATGGATGGTGCC  
CGCCGAGAGATCGTCTGCCGTGCAGATGGCACCATGAGGCTTGGGGAGCCCACCTCCA  
ATGAGACTCTGTCTGCGTCATCATCTTTGTTCATCGTGTACTACGCCCTGATGGCTGGTG  
TGGTTTGGTTTGTGGTCCTCACCTATGCCTGGCACACTTCCTTCAAAGCCCTGGGCACC  
ACCTACCAGCCTCTCTCGGGCAAGACCTCCTACTTCCACCTGCTCACCTGGTCACTCCC  
CTTTGTCTCACTGTGGCAATCCTTGCTGTGGCGCAGGTGGATGGGGACTCTGTGAGT  
GGCATTGTGTTTGTGGGCTACAAGAACTACCGATAACCGTGCGGGCTTCGTGCTGGCCCC  
AATCGGCCTGGTGTTCATCGTGGGAGGCTACTTCTCATCCGAGGAGTCATGACTCTGT  
TCTCCATCAAGAGCAACCACCCCGGGCTGCTGAGTGAGAAGGCTGCCAGCAAGATCA

ACGAGACCATGCTGCGCCTGGGCATTTTTGGCTTCTGGCCTTTGGCTTTGTGCTCATT  
ACCTTCAGCTGCCACTTCTACGACTTCTTCAACCAGGCTGAGTGGGAGCGCAGCTTCC  
GGGACTATGTGCTATGTCAGGCCAATGTGACCATCGGGCTGCCACCAAGCAGCCAT  
CCCTGACTGTGAGATCAAGAATCGCCGAGCCTTCTGGTGGAGAAGATCAACCTGTTT  
GCCATGTTTGGAAGTGGCATCGCCATGAGCACCTGGGTCTGGACCAAGGCCACGCTGC  
TCATCTGGAGGCGTACCTGGTGCAGGTTGACTGGGCAGAGTGACGATGAGCCAAAGC  
GGATCAAGAAGAGCAAGATGATTGCCAAGGCCTTCTCTAAGCGGCACGAGCTCCTGCA  
GAACCCAGGCCAGGAGCTGTCCTTCAGCATGCACACTGTGTCCCACGACGGGCCCGT  
GGCGGGCTTGGCCTTTGACCTCAATGAGCCCTCAGCTGATGTCTCCTCTGCCTGGGCC  
CAGCATGTCACCAAGATGGTGGCTCGGAGAGGAGCCATACTGCCCCAGGATATTTCTG  
TCACCCCTGTGGCAACTCCAGTGCCCCCAGAGGAACAAGCCAACCTGTGGCTGGTTG  
AGGCAGAGATCTCCCAGAGCTGCAGAAGCGCCTGGGCCGGAAGAAGAAGAGGAGG  
AAGAGGAAGAAGGAGGTGTGCCCGCTGGCGCCGCCCTGAGCTTACCCCCCTGCC  
CCTGCCCCAGTACCATTCTCGACTGCCTCAGCTGCCCCGGCAGAAATGCCTGGTGG  
CTGCAGGTGCCTGGGGAGCTGGGGACTCTTGCCGACAGGGAGCGTGGACCCTGGTCT  
CCAACCCATTCTGCCAGAGCCCAGTCCCCCTCAGGATCCATTTCTGCCAGTGCACC  
GGCCCCCGTGGCATGGGCTCATGGCCGCCGACAGGGCCTGGGGCCTATTCACTCCCGC  
ACCAACCTGATGGACACAGAACTCATGGATGCAGACTCGGACTTCGAACAAAACTC  
ATCTCAGAAGAGGATCTGGACTACAAGGATGACGATGACAAGGATTACAAAGACGAC  
GATGATAAGGACTATAAGGATGATGACGACAAATAATCTAGAGGGGCCGTTTAAACCCG  
CTGATCAGCCTCGACTGTGC

Smo F460L:

CTAGAGAACCCACTGCTTACTGGCTTATCGAAATTAATACGACTCACTATAGGGAGACC  
CAAGCTGGCTAGCGTTTAAACTTAAGCTTGGTACCGAGCTCGGATCCGCCACCATGGC  
CGCTGCCCCGCCAGCGCGGGGGCCGGAGCTCCCGCTCCTGGGGCTGCTGCTGCTGCT  
GCTGCTGGGGGACCCGGGCCGGGGGGCGGCCTCGAGCGGGAACGCGACCGGGCCTG  
GGCCTCGGAGCGCGGGCGGGAGCGCGAGGAGGAGCGCGGCGGTGACTGGCCCTCCG  
CCGCCGCTGAGCCACTGCGGCCGGGCTGCCCCCTGCGAGCCGCTGCGCTACAACGTGT  
GCCTGGGCTCGGTGCTGCCCTACGGGGCCACCTCCACACTGCTGGCCGGAGACTCGG  
ACTCCCAGGAGGAAGCGCACGGCAAGCTCGTGCTCTGGTCGGGCCTCCGGAATGCC  
CCCGCTGCTGGGCAGTGATCCAGCCCCTGCTGTGTGCCGTATACATGCCCAAGTGTGA  
GAATGACCGGGTGGAGCTGCCAGCCGTACCCTCTGCCAGGCCACCCGAGGCCCTGT  
GCCATCGTGGAGAGGGAGCGGGGCTGGCCTGACTTCTGCGCTGCACTCCTGACCGCT  
TCCCTGAAGGCTGCACGAATGAGGTGCAGAACATCAAGTTCAACAGTTCAGGCCAGT  
GCGAAGTGCCCTTGGTTCGGACAGACAACCCCAAGAGCTGGTACGAGGACGTGGAGG  
GCTGCGGCATCCAGTGCCAGAACCCGCTCTTCACAGAGGCTGAGCACCAGGACATGC  
ACAGCTACATCGCGCCTTCGGGGCCGTCACGGGCCTCTGCACGCTCTTACCCTGGC  
CACATTCGTGGCTGACTGGCGGAACTCGAATCGCTACCCTGCTGTTATTCTTCTACG  
TCAATGCGTGCTTCTTTGTGGGCAGCATTGGCTGGCTGGCCCAGTTCATGGATGGTGCC  
CGCCGAGAGATCGTCTGCCGTGCAGATGCCACCATGAGGCTTGGGGAGCCCACCTCCA  
ATGAGACTCTGTCCTGCGTCATCATCTTTGTCATCGTGTACTACGCCCTGATGGCTGGTG  
TGGTTTGGTTTGTGGTCCACCTATGCCCTGGCACACTTCCTTCAAAGCCCTGGGCACC  
ACCTACCAGCCTCTCTCGGGCAAGACCTCCTACTTCCACCTGCTCACCTGGTCACTCCC

CTTTGTCCTCACTGTGGCAATCCTTGCTGTGGCGCAGGTGGATGGGGACTCTGTGAGT  
GGCATTGTGTTTGTGGGCTACAAGAACTACCGATAACCGTGCGGGCTTCGTGCTGGCCCC  
AATCGGCCCTGGTGCTCATCGTGGGAGGCTACTTCCTCATCCGAGGAGTCATGACTCTGT  
TCTCCATCAAGAGCAACCACCCCGGGCTGCTGAGTGAGAAGGCTGCCAGCAAGATCA  
ACGAGACCATGCTGCGCCTGGGCATTTTTGGCTTCCTGGCCTTGGGCTTTGTGCTCATT  
ACCTTCAGCTGCCACTTCTACGACTTCTTCAACCAGGCTGAGTGGGAGCGCAGCTTCC  
GGGACTATGTGCTATGTCAGGCCAATGTGACCATCGGGCTGCCACCAAGCAGCCCAT  
CCCTGACTGTGAGATCAAGAATCGCCGAGCCTTCTGGTGGAGAAGATCAACCTGTTT  
GCCATGTTTGAACTGGCATCGCCATGAGCACCTGGGTCTGGACCAAGGCCACGCTGC  
TCATCTGGAGGCGTACCTGGTGCAGGTTGACTGGGCAGAGTGACGATGAGCCAAAGC  
GGATCAAGAAGAGCAAGATGATTGCCAAGGCCTTCTCTAAGCGGCACGAGCTCCTGCA  
GAACCCAGGCCAGGAGCTGTCCTTCAGCATGCACACTGTGTCCCACGACGGGCCCCGT  
GGCGGGCTTGGCCTTTGACCTCAATGAGCCCTCAGCTGATGTCTCCTCTGCCTGGGCC  
CAGCATGTCACCAAGATGGTGGCTCGGAGAGGAGCCATACTGCCCCAGGATATTTCTG  
TCACCCCTGTGGCAACTCCAGTGCCCCCAGAGGAACAAGCCAACCTGTGGCTGGTTG  
AGGCAGAGATCTCCCAGAGCTGCAGAAGCGCCTGGGCCGGAAGAAGAAGAGGAGG  
AAGAGGAAGAAGGAGGTGTGCCCGCTGGCGCCGCCCCCTGAGCTTCACCCCCCTGCC  
CCTGCCCCCAGTACCATTCTCGACTGCCTCAGCTGCCCCGGCAGAAATGCCTGGTGG  
CTGCAGGTGCCTGGGGAGCTGGGGACTCTTGCCGACAGGGAGCGTGGACCCTGGTCT  
CCAACCCATTCTGCCAGAGCCCAGTCCCCCTCAGGATCCATTTCTGCCAGTGCACC  
GGCCCCCGTGGCATGGGCTCATGGCCGCCGACAGGGCCTGGGGCCTATTCCTCCCGC  
ACCAACCTGATGGACACAGAACTCATGGATGCAGACTCGGACTTCGAACAAAACTC  
ATCTCAGAAGAGGATCTGGACTACAAGGATGACGATGACAAGGATTACAAAGACGAC  
GATGATAAGGACTATAAGGATGATGACGACAAATAATCTAGAGGGCCCGTTTAAACCCG  
CTGATCAGCCTCGACTGTGCCTTCTAGTTGCCAGCCATCTGTTGTT

DNA sequencing results are provided below.

Smo D473H:

|                 |       |                                                     |     |
|-----------------|-------|-----------------------------------------------------|-----|
|                 |       | 1                                                   | 50  |
| pSB1296-1       | (1)   | CAGAGCTCTCTGGCTAACTAGAGAACCCACTGCTTACTGGCTTATCGAAA  |     |
| NM_005631.4 CDS | (1)   | -----                                               |     |
|                 |       | 51                                                  | 100 |
| pSB1296-1       | (51)  | TTAATACGACTCACTATAGGGAGACCCAAGCTGGCTAGCGTTTAACTTA   |     |
| NM_005631.4 CDS | (1)   | -----                                               |     |
|                 |       | 101                                                 | 150 |
| pSB1296-1       | (101) | AGCTTGGTACCGAGCTCGGATCCGCCACCATGGCCGCTGCCCGCCAGCG   |     |
| NM_005631.4 CDS | (1)   | -----ATGGCCGCTGCCCGCCAGCG                           |     |
|                 |       | 151                                                 | 200 |
| pSB1296-1       | (151) | CGGGGGCCGGAGCTCCCGCTCCTGGGGCTGCTGCTGCTGCTGCTGGG     |     |
| NM_005631.4 CDS | (22)  | CGGGGGCCGGAGCTCCCGCTCCTGGGGCTGCTGCTGCTGCTGCTGGG     |     |
|                 |       | 201                                                 | 250 |
| pSB1296-1       | (201) | GGACCCGGGCCGGGGGGCGGCCTCGAGCGGGAACGCGACCGGGCCTGGGC  |     |
| NM_005631.4 CDS | (72)  | GGACCCGGGCCGGGGGGCGGCCTCGAGCGGGAACGCGACCGGGCCTGGGC  |     |
|                 |       | 251                                                 | 300 |
| pSB1296-1       | (251) | CTCGGAGCGCGGGCGGGAGCGGAGGAGGAGCGCGGCGGTGACTGGCCCT   |     |
| NM_005631.4 CDS | (122) | CTCGGAGCGCGGGCGGGAGCGGAGGAGGAGCGCGGCGGTGACTGGCCCT   |     |
|                 |       | 301                                                 | 350 |
| pSB1296-1       | (301) | CCGCCGCCGCTGAGCCACTGCGGCCGGGCTGCCCCCTGCGAGCCGCTGCG  |     |
| NM_005631.4 CDS | (172) | CCGCCGCCGCTGAGCCACTGCGGCCGGGCTGCCCCCTGCGAGCCGCTGCG  |     |
|                 |       | 351                                                 | 400 |
| pSB1296-1       | (351) | CTACAACGTGTGCCTGGGCTCGGTGCTGCCCTACGGGGCCACCTCCACAC  |     |
| NM_005631.4 CDS | (222) | CTACAACGTGTGCCTGGGCTCGGTGCTGCCCTACGGGGCCACCTCCACAC  |     |
|                 |       | 401                                                 | 450 |
| pSB1296-1       | (401) | TGCTGGCCGGAGACTCGGACTCCCAGGAGGAAGCGCACGGCAAGCTCGTG  |     |
| NM_005631.4 CDS | (272) | TGCTGGCCGGAGACTCGGACTCCCAGGAGGAAGCGCACGGCAAGCTCGTG  |     |
|                 |       | 451                                                 | 500 |
| pSB1296-1       | (451) | CTCTGGTTCGGGCCTCCGGAATGCCCCCGCTGCTGGGCAGTGATCCAGCC  |     |
| NM_005631.4 CDS | (322) | CTCTGGTTCGGGCCTCCGGAATGCCCCCGCTGCTGGGCAGTGATCCAGCC  |     |
|                 |       | 501                                                 | 550 |
| pSB1296-1       | (501) | CCTGCTGTGTGCCGTATACATGCCCAAGTGTGAGAAATGACCGGGTGGAGC |     |
| NM_005631.4 CDS | (372) | CCTGCTGTGTGCCGTATACATGCCCAAGTGTGAGAAATGACCGGGTGGAGC |     |
|                 |       | 551                                                 | 600 |
| pSB1296-1       | (551) | TGCCCAGCCGTACCCTCTGCCAGGCCACCCGAGGCCCTGTGCCATCGTG   |     |
| NM_005631.4 CDS | (422) | TGCCCAGCCGTACCCTCTGCCAGGCCACCCGAGGCCCTGTGCCATCGTG   |     |
|                 |       | 601                                                 | 650 |
| pSB1296-1       | (601) | GAGAGGGAGCGGGGCTGGCCTGACTTCCTGCGCTGCACCTCCTGACCGCTT |     |



|                 |        |                                                     |      |      |
|-----------------|--------|-----------------------------------------------------|------|------|
| NM_005631.4 CDS | (472)  | GAGAGGGAGCGGGGCTGGCCTGACTTCCTGCGCTGCACTCCTGACCGCTT  | 651  | 700  |
| pSB1296-1       | (651)  | CCCTGAAGGCTGCACGAATGAGGTGCAGAACATCAAGTTCAACAGTTCAG  |      |      |
| NM_005631.4 CDS | (522)  | CCCTGAAGGCTGCACGAATGAGGTGCAGAACATCAAGTTCAACAGTTCAG  | 701  | 750  |
| pSB1296-1       | (701)  | GCCAGTGCGAAGTGCCCTTGGTTCCGGACAGACAACCCCAAGAGCTGGTAC |      |      |
| NM_005631.4 CDS | (572)  | GCCAGTGCGAAGTGCCCTTGGTTCCGGACAGACAACCCCAAGAGCTGGTAC | 751  | 800  |
| pSB1296-1       | (751)  | GAGGACGTGGAGGGCTGCGGCATCCAGTGCCAGAACCCGCTCTTCACAGA  |      |      |
| NM_005631.4 CDS | (622)  | GAGGACGTGGAGGGCTGCGGCATCCAGTGCCAGAACCCGCTCTTCACAGA  | 801  | 850  |
| pSB1296-1       | (801)  | GGCTGAGCACCAGGACATGCACAGCTACATCGCGGCCCTTCGGGGCCGTCA |      |      |
| NM_005631.4 CDS | (672)  | GGCTGAGCACCAGGACATGCACAGCTACATCGCGGCCCTTCGGGGCCGTCA | 851  | 900  |
| pSB1296-1       | (851)  | CGGGCCTCTGCACGCTCTTCACCCCTGGCCACATTCGTGGCTGACTGGCGG |      |      |
| NM_005631.4 CDS | (722)  | CGGGCCTCTGCACGCTCTTCACCCCTGGCCACATTCGTGGCTGACTGGCGG | 901  | 950  |
| pSB1296-1       | (901)  | AACTCGAATCGCTACCCTGCTGTTATTCTCTTCTACGTCAATGCGTGCTT  |      |      |
| NM_005631.4 CDS | (772)  | AACTCGAATCGCTACCCTGCTGTTATTCTCTTCTACGTCAATGCGTGCTT  | 951  | 1000 |
| pSB1296-1       | (951)  | CTTTGTGGGCAGCATTGGCTGGCTGGCCAGTTCATGGATGGTGCCCGCC   |      |      |
| NM_005631.4 CDS | (822)  | CTTTGTGGGCAGCATTGGCTGGCTGGCCAGTTCATGGATGGTGCCCGCC   | 1001 | 1050 |
| pSB1296-1       | (1001) | GAGAGATCGTCTGCCGTGCAGATGGCACCATGAGGCTTGGGGAGCCCACC  |      |      |
| NM_005631.4 CDS | (872)  | GAGAGATCGTCTGCCGTGCAGATGGCACCATGAGGCTTGGGGAGCCCACC  | 1051 | 1100 |
| pSB1296-1       | (1051) | TCCAATGAGACTCTGTCCCTGCGTCATCATCTTTGTCATCGTGTACTACGC |      |      |
| NM_005631.4 CDS | (922)  | TCCAATGAGACTCTGTCCCTGCGTCATCATCTTTGTCATCGTGTACTACGC | 1101 | 1150 |
| pSB1296-1       | (1101) | CCTGATGGCTGGTGTGGTTTGGTTTGTGGTCCCTCACCTATGCCTGGCACA |      |      |
| NM_005631.4 CDS | (972)  | CCTGATGGCTGGTGTGGTTTGGTTTGTGGTCCCTCACCTATGCCTGGCACA | 1151 | 1200 |
| pSB1296-1       | (1151) | CTTCCTTCAAAGCCCTGGGCACCACCTACCAGCCTCTCTCGGGCAAGACC  |      |      |
| NM_005631.4 CDS | (1022) | CTTCCTTCAAAGCCCTGGGCACCACCTACCAGCCTCTCTCGGGCAAGACC  | 1201 | 1250 |
| pSB1296-1       | (1201) | TCCTACTTCCACCTGCTCACCTGGTCACTCCCCTTTGTCCTCACTGTGGC  |      |      |
| NM_005631.4 CDS | (1072) | TCCTACTTCCACCTGCTCACCTGGTCACTCCCCTTTGTCCTCACTGTGGC  | 1251 | 1300 |
| pSB1296-1       | (1251) | AATCCTTGCTGTGGCGCAGGTGGATGGGGACTCTGTGAGTGGCATTGTGT  |      |      |
| NM_005631.4 CDS | (1122) | AATCCTTGCTGTGGCGCAGGTGGATGGGGACTCTGTGAGTGGCATTGTGT  | 1301 | 1350 |
| pSB1296-1       | (1301) | TTGTGGGCTACAAGAACTACCGATACCGTGCGGGCTTCGTGCTGGCCCCA  |      |      |
| NM_005631.4 CDS | (1172) | TTGTGGGCTACAAGAACTACCGATACCGTGCGGGCTTCGTGCTGGCCCCA  | 1351 | 1400 |

|                 |        |                                                    |
|-----------------|--------|----------------------------------------------------|
| pSB1296-1       | (1351) | ATCGGCCTGGTGCTCATCGTGGGAGGCTACTTCCTCATCCGAGGAGTCAT |
| NM_005631.4 CDS | (1222) | ATCGGCCTGGTGCTCATCGTGGGAGGCTACTTCCTCATCCGAGGAGTCAT |
|                 | 1401   | 1450                                               |
| pSB1296-1       | (1401) | GACTCTGTTCTCCATCAAGAGCAACCACCCCGGGCTGCTGAGTGAGAAGG |
| NM_005631.4 CDS | (1272) | GACTCTGTTCTCCATCAAGAGCAACCACCCCGGGCTGCTGAGTGAGAAGG |
|                 | 1451   | 1500                                               |
| pSB1296-1       | (1451) | CTGCCAGCAAGATCAACGAGACCATGCTGCGCCTGGGCATTTTTGGCTTC |
| NM_005631.4 CDS | (1322) | CTGCCAGCAAGATCAACGAGACCATGCTGCGCCTGGGCATTTTTGGCTTC |
|                 | 1501   | 1550                                               |
| pSB1296-1       | (1501) | CTGGCCTTTGGCTTTGTGCTCATTACCTTCAGCTGCCACTTCTACCACTT |
| NM_005631.4 CDS | (1372) | CTGGCCTTTGGCTTTGTGCTCATTACCTTCAGCTGCCACTTCTACCACTT |
|                 | 1551   | 1600                                               |
| pSB1296-1       | (1551) | CTTCAACCAGGCTGAGTGGGAGCGCAGCTTCCGGGACTATGTGCTATGTC |
| NM_005631.4 CDS | (1422) | CTTCAACCAGGCTGAGTGGGAGCGCAGCTTCCGGGACTATGTGCTATGTC |
|                 | 1601   | 1650                                               |
| pSB1296-1       | (1601) | AGGCCAATGTGACCATCGGGCTGCCACCAAGCAGCCCATCCCTGACTGT  |
| NM_005631.4 CDS | (1472) | AGGCCAATGTGACCATCGGGCTGCCACCAAGCAGCCCATCCCTGACTGT  |
|                 | 1651   | 1700                                               |
| pSB1296-1       | (1651) | GAGATCAAGAATCGCCCGAGCCTTCTGGTGGAGAAGATCAACCTGTTTGC |
| NM_005631.4 CDS | (1522) | GAGATCAAGAATCGCCCGAGCCTTCTGGTGGAGAAGATCAACCTGTTTGC |
|                 | 1701   | 1750                                               |
| pSB1296-1       | (1701) | CATGTTTGGAACTGGCATCGCCATGAGCACCTGGGTCTGGACCAAGGCCA |
| NM_005631.4 CDS | (1572) | CATGTTTGGAACTGGCATCGCCATGAGCACCTGGGTCTGGACCAAGGCCA |
|                 | 1751   | 1800                                               |
| pSB1296-1       | (1751) | CGCTGCTCATCTGGAGGCGTACCTGGTGCAGGTTGACTGGGCAGAGTGAC |
| NM_005631.4 CDS | (1622) | CGCTGCTCATCTGGAGGCGTACCTGGTGCAGGTTGACTGGGCAGAGTGAC |
|                 | 1801   | 1850                                               |
| pSB1296-1       | (1801) | GATGAGCCAAAGCGGATCAAGAAGAGCAAGATGATTGCCAAGGCCTTCTC |
| NM_005631.4 CDS | (1672) | GATGAGCCAAAGCGGATCAAGAAGAGCAAGATGATTGCCAAGGCCTTCTC |
|                 | 1851   | 1900                                               |
| pSB1296-1       | (1851) | TAAGCGGCACGAGCTCCTGCAGAACCCAGGCCAGGAGCTGTCCTTCAGCA |
| NM_005631.4 CDS | (1722) | TAAGCGGCACGAGCTCCTGCAGAACCCAGGCCAGGAGCTGTCCTTCAGCA |
|                 | 1901   | 1950                                               |
| pSB1296-1       | (1901) | TGCACACTGTGTCCACGACGGGCCCGTGGCGGGCTTGGCCTTTGACCTC  |
| NM_005631.4 CDS | (1772) | TGCACACTGTGTCCACGACGGGCCCGTGGCGGGCTTGGCCTTTGACCTC  |
|                 | 1951   | 2000                                               |
| pSB1296-1       | (1951) | AATGAGCCCTCAGCTGATGTCTCCTCTGCCTGGGCCCAGCATGTCACCAA |
| NM_005631.4 CDS | (1822) | AATGAGCCCTCAGCTGATGTCTCCTCTGCCTGGGCCCAGCATGTCACCAA |
|                 | 2001   | 2050                                               |
| pSB1296-1       | (2001) | GATGGTGGCTCGGAGAGGAGCCATACTGCCCCAGGATATTTCTGTCACCC |
| NM_005631.4 CDS | (1872) | GATGGTGGCTCGGAGAGGAGCCATACTGCCCCAGGATATTTCTGTCACCC |
|                 | 2051   | 2100                                               |
| pSB1296-1       | (2051) | CTGTGGCAACTCCAGTGCCCCCAGAGGAACAAGCCAACCTGTGGCTGGTT |
| NM_005631.4 CDS | (1922) | CTGTGGCAACTCCAGTGCCCCCAGAGGAACAAGCCAACCTGTGGCTGGTT |

|                 |        |                                                     |                           |      |
|-----------------|--------|-----------------------------------------------------|---------------------------|------|
|                 |        | 2101                                                |                           | 2150 |
| pSB1296-1       | (2101) | GAGGCAGAGATCTCCCCAGAGCTGCAGAAGCGCCTGGGCCGGAAGAAGAA  |                           |      |
| NM_005631.4 CDS | (1972) | GAGGCAGAGATCTCCCCAGAGCTGCAGAAGCGCCTGGGCCGGAAGAAGAA  |                           |      |
|                 |        | 2151                                                |                           | 2200 |
| pSB1296-1       | (2151) | GAGGAGGAAGAGGAAGAAGGAGGTGTGCCCGCTGGCGCCGCCCTGAGC    |                           |      |
| NM_005631.4 CDS | (2022) | GAGGAGGAAGAGGAAGAAGGAGGTGTGCCCGCTGGCGCCGCCCTGAGC    |                           |      |
|                 |        | 2201                                                |                           | 2250 |
| pSB1296-1       | (2201) | TTCACCCCCCTGCCCTGCCCCAGTACCATTCTCGACTGCCTCAGCTG     |                           |      |
| NM_005631.4 CDS | (2072) | TTCACCCCCCTGCCCTGCCCCAGTACCATTCTCGACTGCCTCAGCTG     |                           |      |
|                 |        | 2251                                                |                           | 2300 |
| pSB1296-1       | (2251) | CCCCGGCAGAAATGCCTGGTGGCTGCAGGTGCCTGGGGAGCTGGGGACTC  |                           |      |
| NM_005631.4 CDS | (2122) | CCCCGGCAGAAATGCCTGGTGGCTGCAGGTGCCTGGGGAGCTGGGGACTC  |                           |      |
|                 |        | 2301                                                |                           | 2350 |
| pSB1296-1       | (2301) | TTGCCGACAGGGAGCGTGGACCCTGGTCTCCAACCCATTCTGCCCAGAGC  |                           |      |
| NM_005631.4 CDS | (2172) | TTGCCGACAGGGAGCGTGGACCCTGGTCTCCAACCCATTCTGCCCAGAGC  |                           |      |
|                 |        | 2351                                                |                           | 2400 |
| pSB1296-1       | (2351) | CCAGTCCCCCTCAGGATCCATTTCTGCCAGTGCACCGGCCCCCGTGGCA   |                           |      |
| NM_005631.4 CDS | (2222) | CCAGTCCCCCTCAGGATCCATTTCTGCCAGTGCACCGGCCCCCGTGGCA   |                           |      |
|                 |        | 2401                                                |                           | 2450 |
| pSB1296-1       | (2401) | TGGGCTCATGGCCGCCGACAGGGCCTGGGGCCTATTCACCTCCCGCACCAA |                           |      |
| NM_005631.4 CDS | (2272) | TGGGCTCATGGCCGCCGACAGGGCCTGGGGCCTATTCACCTCCCGCACCAA |                           |      |
|                 |        | 2451                                                |                           | 2500 |
| pSB1296-1       | (2451) | CCTGATGGACACAGAACTCATGGATGCAGACTCGGACTTCTGACTCGAGT  |                           |      |
| NM_005631.4 CDS | (2322) | CCTGATGGACACAGAACTCATGGATGCAGACTCGGACTTCTGACTCGAGT  |                           |      |
|                 |        |                                                     |                           | 2501 |
|                 |        |                                                     | pSB1296-1 (2501) CT       |      |
|                 |        |                                                     | NM_005631.4 CDS (2365) -- |      |



Smo W535L

|                 |       |                                                    |  |     |
|-----------------|-------|----------------------------------------------------|--|-----|
|                 |       | 1                                                  |  | 50  |
| pSB936-4        | (1)   | TGCGATGGTGCAATAGCAGAGCTCGTTTAGTGACCGTCAGAAATTTGTAA |  |     |
| NM_005631.4 CDS | (1)   | -----                                              |  |     |
|                 |       | 51                                                 |  | 100 |
| pSB936-4        | (51)  | TACGACTCACTATAGGGCGGCCGGGAATTCGTCGACTGGATCCGGTACCG |  |     |
| NM_005631.4 CDS | (1)   | -----                                              |  |     |
|                 |       | 101                                                |  | 150 |
| pSB936-4        | (101) | AGGAGATCTGCCGCCGCGATCGCCATGGCCGCTGCCCGCCCAGCGCGGGG |  |     |
| NM_005631.4 CDS | (1)   | -----ATGGCCGCTGCCCGCCCAGCGCGGGG                    |  |     |
|                 |       | 151                                                |  | 200 |
| pSB936-4        | (151) | GCCGGAGCTCCCGCTCCTGGGGCTGCTGCTGCTGCTGCTGCTGGGGGACC |  |     |
| NM_005631.4 CDS | (27)  | GCCGGAGCTCCCGCTCCTGGGGCTGCTGCTGCTGCTGCTGCTGGGGGACC |  |     |
|                 |       | 201                                                |  | 250 |
| pSB936-4        | (201) | CGGGCCGGGGGGCGGCCTCGAGCGGGAACGCGACCGGGCCTGGGCCTCGG |  |     |
| NM_005631.4 CDS | (77)  | CGGGCCGGGGGGCGGCCTCGAGCGGGAACGCGACCGGGCCTGGGCCTCGG |  |     |
|                 |       | 251                                                |  | 300 |
| pSB936-4        | (251) | AGCGCGGGCGGGAGCGCGAGGAGCGCGGCGGTGACTGGCCCTCCGCC    |  |     |
| NM_005631.4 CDS | (127) | AGCGCGGGCGGGAGCGCGAGGAGCGCGGCGGTGACTGGCCCTCCGCC    |  |     |
|                 |       | 301                                                |  | 350 |
| pSB936-4        | (301) | GCCGCTGAGCCACTGCGGCCGGGCTGCCCCCTGCGAGCCGCTGCGCTACA |  |     |
| NM_005631.4 CDS | (177) | GCCGCTGAGCCACTGCGGCCGGGCTGCCCCCTGCGAGCCGCTGCGCTACA |  |     |
|                 |       | 351                                                |  | 400 |
| pSB936-4        | (351) | ACGTGTGCCTGGGCTCGGTGCTGCCCTACGGGGCCACCTCCACACTGCTG |  |     |
| NM_005631.4 CDS | (227) | ACGTGTGCCTGGGCTCGGTGCTGCCCTACGGGGCCACCTCCACACTGCTG |  |     |
|                 |       | 401                                                |  | 450 |
| pSB936-4        | (401) | GCCGGAGACTCGGACTCCCAGGAGGAAGCGCACGGCAAGCTCGTGCTCTG |  |     |
| NM_005631.4 CDS | (277) | GCCGGAGACTCGGACTCCCAGGAGGAAGCGCACGGCAAGCTCGTGCTCTG |  |     |
|                 |       | 451                                                |  | 500 |
| pSB936-4        | (451) | GTCGGGCCTCCGGAATGCCCCCGCTGCTGGGCAGTGATCCAGCCCCTGC  |  |     |
| NM_005631.4 CDS | (327) | GTCGGGCCTCCGGAATGCCCCCGCTGCTGGGCAGTGATCCAGCCCCTGC  |  |     |
|                 |       | 501                                                |  | 550 |
| pSB936-4        | (501) | TGTGTGCCGTATACATGCCCAAGTGTGAGAATGACCGGGTGGAGCTGCC  |  |     |
| NM_005631.4 CDS | (377) | TGTGTGCCGTATACATGCCCAAGTGTGAGAATGACCGGGTGGAGCTGCC  |  |     |
|                 |       | 551                                                |  | 600 |
| pSB936-4        | (551) | AGCCGTACCCTCTGCCAGGCCACCCGAGGCCCTGTGCCATCGTGGAGAG  |  |     |
| NM_005631.4 CDS | (427) | AGCCGTACCCTCTGCCAGGCCACCCGAGGCCCTGTGCCATCGTGGAGAG  |  |     |
|                 |       | 601                                                |  | 650 |
| pSB936-4        | (601) | GGAGCGGGGCTGGCCTGACTTCCTGCGCTGCACTCCTGACCGCTTCCCTG |  |     |

|                 |        |                                                     |      |      |
|-----------------|--------|-----------------------------------------------------|------|------|
| NM_005631.4 CDS | (477)  | GGAGCGGGGCTGGCCTGACTTCTCGCGCTGCACTCCTGACCGCTTCCCTG  | 651  | 700  |
| pSB936-4        | (651)  | AAGGCTGCACGAATGAGGTGCAGAACATCAAGTTCAACAGTTCAGGCCAG  |      |      |
| NM_005631.4 CDS | (527)  | AAGGCTGCACGAATGAGGTGCAGAACATCAAGTTCAACAGTTCAGGCCAG  | 701  | 750  |
| pSB936-4        | (701)  | TGCGAAGTGCCTTGGTTTCGGACAGACAACCCCAAGAGCTGGTACGAGGA  |      |      |
| NM_005631.4 CDS | (577)  | TGCGAAGTGCCTTGGTTTCGGACAGACAACCCCAAGAGCTGGTACGAGGA  | 751  | 800  |
| pSB936-4        | (751)  | CGTGGAGGGCTGCGGCATCCAGTGCCAGAACCCGCTCTTCACAGAGGCTG  |      |      |
| NM_005631.4 CDS | (627)  | CGTGGAGGGCTGCGGCATCCAGTGCCAGAACCCGCTCTTCACAGAGGCTG  | 801  | 850  |
| pSB936-4        | (801)  | AGCACCAGGACATGCACAGCTACATCGCGGCCTTCGGGGCCGTACAGGGC  |      |      |
| NM_005631.4 CDS | (677)  | AGCACCAGGACATGCACAGCTACATCGCGGCCTTCGGGGCCGTACAGGGC  | 851  | 900  |
| pSB936-4        | (851)  | CTCTGCACGCTCTTCACCCTGGCCACATTCGTGGCTGACTGGCGGAACTC  |      |      |
| NM_005631.4 CDS | (727)  | CTCTGCACGCTCTTCACCCTGGCCACATTCGTGGCTGACTGGCGGAACTC  | 901  | 950  |
| pSB936-4        | (901)  | GAATCGCTACCCTGCTGTTATTCTCTTCTACGTCAATGCGTGCTTCTTTG  |      |      |
| NM_005631.4 CDS | (777)  | GAATCGCTACCCTGCTGTTATTCTCTTCTACGTCAATGCGTGCTTCTTTG  | 951  | 1000 |
| pSB936-4        | (951)  | TGGGCAGCATTGGCTGGCTGGCCCAGTTCATGGATGGTGCCCGCCGAGAG  |      |      |
| NM_005631.4 CDS | (827)  | TGGGCAGCATTGGCTGGCTGGCCCAGTTCATGGATGGTGCCCGCCGAGAG  | 1001 | 1050 |
| pSB936-4        | (1001) | ATCGTCTGCCGTGCAGATGGCACCATGAGGCTTGGGGAGCCCACCTCCAA  |      |      |
| NM_005631.4 CDS | (877)  | ATCGTCTGCCGTGCAGATGGCACCATGAGGCTTGGGGAGCCCACCTCCAA  | 1051 | 1100 |
| pSB936-4        | (1051) | TGAGACTCTGTCTCGTCATCATCTTTGTCATCGTGTACTACGCCCTGA    |      |      |
| NM_005631.4 CDS | (927)  | TGAGACTCTGTCTCGTCATCATCTTTGTCATCGTGTACTACGCCCTGA    | 1101 | 1150 |
| pSB936-4        | (1101) | TGGCTGGTGTGGTTTGGTTTGTGGTCCCTCACCTATGCCTGGCACACTTCC |      |      |
| NM_005631.4 CDS | (977)  | TGGCTGGTGTGGTTTGGTTTGTGGTCCCTCACCTATGCCTGGCACACTTCC | 1151 | 1200 |
| pSB936-4        | (1151) | TTCAAAGCCCTGGGCACCACCTACCAGCCTCTCTCGGGCAAGACCTCCTA  |      |      |
| NM_005631.4 CDS | (1027) | TTCAAAGCCCTGGGCACCACCTACCAGCCTCTCTCGGGCAAGACCTCCTA  | 1201 | 1250 |
| pSB936-4        | (1201) | CTTCCACCTGCTCACCTGGTCACTCCCCTTTGTCTCACTGTGGCAATCC   |      |      |
| NM_005631.4 CDS | (1077) | CTTCCACCTGCTCACCTGGTCACTCCCCTTTGTCTCACTGTGGCAATCC   | 1251 | 1300 |
| pSB936-4        | (1251) | TTGCTGTGGCGCAGGTGGATGGGGACTCTGTGAGTGGCATTGTTTTGTG   |      |      |
| NM_005631.4 CDS | (1127) | TTGCTGTGGCGCAGGTGGATGGGGACTCTGTGAGTGGCATTGTTTTGTG   | 1301 | 1350 |
| pSB936-4        | (1301) | GGCTACAAGAACTACCGATACCGTGCGGGCTTCGTGCTGGCCCCAATCGG  |      |      |
| NM_005631.4 CDS | (1177) | GGCTACAAGAACTACCGATACCGTGCGGGCTTCGTGCTGGCCCCAATCGG  | 1351 | 1400 |

|                 |        |                                                    |
|-----------------|--------|----------------------------------------------------|
| pSB936-4        | (1351) | CCTGGTGCTCATCGTGGGAGGCTACTTCCTCATCCGAGGAGTCATGACTC |
| NM_005631.4 CDS | (1227) | CCTGGTGCTCATCGTGGGAGGCTACTTCCTCATCCGAGGAGTCATGACTC |
|                 |        | 1401 1450                                          |
| pSB936-4        | (1401) | TGTTCTCCATCAAGAGCAACCACCCCGGGCTGCTGAGTGAGAAGGCTGCC |
| NM_005631.4 CDS | (1277) | TGTTCTCCATCAAGAGCAACCACCCCGGGCTGCTGAGTGAGAAGGCTGCC |
|                 |        | 1451 1500                                          |
| pSB936-4        | (1451) | AGCAAGATCAACGAGACCATGCTGCGCCTGGGCATTTTGGCTTCCTGGC  |
| NM_005631.4 CDS | (1327) | AGCAAGATCAACGAGACCATGCTGCGCCTGGGCATTTTGGCTTCCTGGC  |
|                 |        | 1501 1550                                          |
| pSB936-4        | (1501) | CTTTGGCTTTGTGCTCATTACCTTCAGCTGCCACTTCTACGACTTCTTCA |
| NM_005631.4 CDS | (1377) | CTTTGGCTTTGTGCTCATTACCTTCAGCTGCCACTTCTACGACTTCTTCA |
|                 |        | 1551 1600                                          |
| pSB936-4        | (1551) | ACCAGGCTGAGTGGGAGCGCAGCTTCCGGGACTATGTGCTATGTCAGGCC |
| NM_005631.4 CDS | (1427) | ACCAGGCTGAGTGGGAGCGCAGCTTCCGGGACTATGTGCTATGTCAGGCC |
|                 |        | 1601 1650                                          |
| pSB936-4        | (1601) | AATGTGACCATCGGGCTGCCCACCAAGCAGCCCATCCCTGACTGTGAGAT |
| NM_005631.4 CDS | (1477) | AATGTGACCATCGGGCTGCCCACCAAGCAGCCCATCCCTGACTGTGAGAT |
|                 |        | 1651 1700                                          |
| pSB936-4        | (1651) | CAAGAATCGCCCGAGCCTTCTGGTGGAGAAGATCAACCTGTTTGCCATGT |
| NM_005631.4 CDS | (1527) | CAAGAATCGCCCGAGCCTTCTGGTGGAGAAGATCAACCTGTTTGCCATGT |
|                 |        | 1701 1750                                          |
| pSB936-4        | (1701) | TTGGAACTGGCATCGCCATGAGCACCTGGTCTGGACCAAGGCCACGCTG  |
| NM_005631.4 CDS | (1577) | TTGGAACTGGCATCGCCATGAGCACCTGGTCTGGACCAAGGCCACGCTG  |
|                 |        | 1751 1800                                          |
| pSB936-4        | (1751) | CTCATCTGGAGGCGTACCTGGTGCAGGTTGACTGGGCAGAGTGACGATGA |
| NM_005631.4 CDS | (1627) | CTCATCTGGAGGCGTACCTGGTGCAGGTTGACTGGGCAGAGTGACGATGA |
|                 |        | 1801 1850                                          |
| pSB936-4        | (1801) | GCCAAAGCGGATCAAGAAGAGCAAGATGATTGCCAAGGCCTTCTCTAAGC |
| NM_005631.4 CDS | (1677) | GCCAAAGCGGATCAAGAAGAGCAAGATGATTGCCAAGGCCTTCTCTAAGC |
|                 |        | 1851 1900                                          |
| pSB936-4        | (1851) | GGCACGAGCTCCTGCAGAACCAGGCCAGGAGCTGTCCTTCAGCATGCAC  |
| NM_005631.4 CDS | (1727) | GGCACGAGCTCCTGCAGAACCAGGCCAGGAGCTGTCCTTCAGCATGCAC  |
|                 |        | 1901 1950                                          |
| pSB936-4        | (1901) | ACTGTGTCCCACGACGGGCCCGTGGCGGGCTTGGCCTTTGACCTCAATGA |
| NM_005631.4 CDS | (1777) | ACTGTGTCCCACGACGGGCCCGTGGCGGGCTTGGCCTTTGACCTCAATGA |
|                 |        | 1951 2000                                          |
| pSB936-4        | (1951) | GCCCTCAGCTGATGTCTCCTCTGCCTGGGCCAGCATGTCACCAAGATGG  |
| NM_005631.4 CDS | (1827) | GCCCTCAGCTGATGTCTCCTCTGCCTGGGCCAGCATGTCACCAAGATGG  |
|                 |        | 2001 2050                                          |
| pSB936-4        | (2001) | TGGCTCGGAGAGGAGCCATACTGCCCCAGGATATTTCTGTCACCCCTGTG |
| NM_005631.4 CDS | (1877) | TGGCTCGGAGAGGAGCCATACTGCCCCAGGATATTTCTGTCACCCCTGTG |
|                 |        | 2051 2100                                          |
| pSB936-4        | (2051) | GCAACTCCAGTGCCCCCAGAGGAACAAGCCAACCTGTGGCTGGTTGAGGC |
| NM_005631.4 CDS | (1927) | GCAACTCCAGTGCCCCCAGAGGAACAAGCCAACCTGTGGCTGGTTGAGGC |



|             |        |             |                                                     |                  |       |
|-------------|--------|-------------|-----------------------------------------------------|------------------|-------|
|             |        |             | 2101                                                |                  | 2150  |
| pSB936-4    | (2101) |             | AGAGATCTCCCCAGAGCTGCAGAAGCGCCTGGGCCGGAAGAAGAGAGGA   |                  |       |
| NM_005631.4 | CDS    | (1977)      | AGAGATCTCCCCAGAGCTGCAGAAGCGCCTGGGCCGGAAGAAGAGAGGA   |                  |       |
|             |        |             | 2151                                                |                  | 2200  |
| pSB936-4    | (2151) |             | GGAAGAGGAAGAAGGAGGTGTGCCCCGCTGGCGCCGCCCCCTGAGCTTCAC |                  |       |
| NM_005631.4 | CDS    | (2027)      | GGAAGAGGAAGAAGGAGGTGTGCCCCGCTGGCGCCGCCCCCTGAGCTTCAC |                  |       |
|             |        |             | 2201                                                |                  | 2250  |
| pSB936-4    | (2201) |             | CCCCCTGCCCTGCCCCAGTACCATTCCCTCGACTGCCTCAGCTGCCCCG   |                  |       |
| NM_005631.4 | CDS    | (2077)      | CCCCCTGCCCTGCCCCAGTACCATTCCCTCGACTGCCTCAGCTGCCCCG   |                  |       |
|             |        |             | 2251                                                |                  | 2300  |
| pSB936-4    | (2251) |             | GCAGAAATGCCTGGTGGCTGCAGGTGCCTGGGGAGCTGGGGACTCTTGCC  |                  |       |
| NM_005631.4 | CDS    | (2127)      | GCAGAAATGCCTGGTGGCTGCAGGTGCCTGGGGAGCTGGGGACTCTTGCC  |                  |       |
|             |        |             | 2301                                                |                  | 2350  |
| pSB936-4    | (2301) |             | GACAGGGAGCGTGGACCCTGGTCTCCAACCCATTCTGCCAGAGCCCAGT   |                  |       |
| NM_005631.4 | CDS    | (2177)      | GACAGGGAGCGTGGACCCTGGTCTCCAACCCATTCTGCCAGAGCCCAGT   |                  |       |
|             |        |             | 2351                                                |                  | 2400  |
| pSB936-4    | (2351) |             | CCCCCTCAGGATCCATTTCTGCCAGTGCACCGGCCCCCGTGGCATGGGC   |                  |       |
| NM_005631.4 | CDS    | (2227)      | CCCCCTCAGGATCCATTTCTGCCAGTGCACCGGCCCCCGTGGCATGGGC   |                  |       |
|             |        |             | 2401                                                |                  | 2450  |
| pSB936-4    | (2401) |             | TCATGGCCGCCGACAGGGCCTGGGGCCTATTCACTCCCGCACCAACCTGA  |                  |       |
| NM_005631.4 | CDS    | (2277)      | TCATGGCCGCCGACAGGGCCTGGGGCCTATTCACTCCCGCACCAACCTGA  |                  |       |
|             |        |             | 2451                                                |                  | 2500  |
| pSB936-4    | (2451) |             | TGGACACAGAACTCATGGATGCAGACTCGGACTTCACGCGTACGCGGCCG  |                  |       |
| NM_005631.4 | CDS    | (2327)      | TGGACACAGAACTCATGGATGCAGACTCGGACTTCACGCGTACGCGGCCG  |                  |       |
|             |        |             | 2501                                                |                  | 2550  |
| pSB936-4    | (2501) |             | CTCGAGCAGAAACTCATCTCAGAAGAGGATCTGGCAGCAAATGATATCCT  |                  |       |
| NM_005631.4 | CDS    | (2365)      | -----                                               |                  |       |
|             |        |             | 2551                                                |                  | 2600  |
| pSB936-4    | (2551) |             | GGATTACAAGGATGACGACGATAAGGTTTAAACGGCCGCGCGGTCATA    |                  |       |
| NM_005631.4 | CDS    | (2365)      | -----                                               |                  |       |
|             |        |             | 2601                                                |                  | 2650  |
| pSB936-4    | (2601) |             | GCTGTTTCTGAAACAGATCCCGGGTGGCATCCCTGTGACCCCTCCCAGT   |                  |       |
| NM_005631.4 | CDS    | (2365)      | -----                                               |                  |       |
|             |        |             | 2651                                                |                  | 2700  |
| pSB936-4    | (2651) |             | GCCTCTCCTGGCCCTGGAAGTTGCCACTCCAGTGCCCACCAGCCTGTCCCT |                  |       |
| NM_005631.4 | CDS    | (2365)      | -----                                               |                  |       |
|             |        |             |                                                     | 2701             | 2716  |
|             |        | pSB936-4    | (2701)                                              | AATAAATAGTCAACGT |       |
|             |        | NM_005631.4 | CDS                                                 | (2365)           | ----- |

Smo H231R:

|         |        |                                                     |                                       |       |
|---------|--------|-----------------------------------------------------|---------------------------------------|-------|
|         |        | 829                                                 |                                       | 878   |
| PSE2260 | (829)  | CTAGAGAACCCACTGCTTACTGGCTTATCGAAATTAATACGACTCACTAT  |                                       |       |
|         |        |                                                     | PSE2260 seq splicing                  | (1)   |
|         |        | CTAGAGAACCCACTGCTTACTGGCTTATCGAAATTAATACGACTCACTAT  |                                       |       |
|         |        | 879                                                 |                                       | 928   |
| PSE2260 | (879)  | AGGGAGACCCAAGCTGGCTAGCGTTTAAACTTAAGCTTGGTACCGAGCTC  |                                       |       |
|         |        |                                                     | PSE2260 seq splicing                  | (51)  |
|         |        | AGGGAGACCCAAGCTGGCTAGCGTTTAAACTTAAGCTTGGTACCGAGCTC  |                                       |       |
|         |        | 929                                                 |                                       | 978   |
| PSE2260 | (929)  | GGATCCGCCACG                                        | ATGGCCGCTGCCCGCCAGCGCGGGGGCCGGAGCTCCC |       |
|         |        |                                                     | PSE2260 seq splicing                  | (101) |
|         |        | GGATCCGCCACG                                        | ATGGCCGCTGCCCGCCAGCGCGGGGGCCGGAGCTCCC |       |
|         |        | 979                                                 |                                       | 1028  |
| PSE2260 | (979)  | GCTCCTGGGGCTGCTGCTGCTGCTGCTGCTGGGGGACCCGGGCCGGGGG   |                                       |       |
|         |        |                                                     | PSE2260 seq splicing                  | (151) |
|         |        | GCTCCTGGGGCTGCTGCTGCTGCTGCTGCTGGGGGACCCGGGCCGGGGG   |                                       |       |
|         |        | 1029                                                |                                       | 1078  |
| PSE2260 | (1029) | CGGCCTCGAGCGGGAACGCGACCGGGCCTGGGCCTCGGAGCGCGGGCGGG  |                                       |       |
|         |        |                                                     | PSE2260 seq splicing                  | (201) |
|         |        | CGGCCTCGAGCGGGAACGCGACCGGGCCTGGGCCTCGGAGCGCGGGCGGG  |                                       |       |
|         |        | 1079                                                |                                       | 1128  |
| PSE2260 | (1079) | AGCGCGAGGAGGAGCGCGGGCGGTGACTGGCCCTCCGCCCGCGCTGAGCCA |                                       |       |
|         |        |                                                     | PSE2260 seq splicing                  | (251) |
|         |        | AGCGCGAGGAGGAGCGCGGGCGGTGACTGGCCCTCCGCCCGCGCTGAGCCA |                                       |       |
|         |        | 1129                                                |                                       | 1178  |
| PSE2260 | (1129) | CTGCGGCCGGGCTGCCCCCTGCGAGCCGCTGCGCTACAACGTGTGCCTGG  |                                       |       |
|         |        |                                                     | PSE2260 seq splicing                  | (301) |
|         |        | CTGCGGCCGGGCTGCCCCCTGCGAGCCGCTGCGCTACAACGTGTGCCTGG  |                                       |       |
|         |        | 1179                                                |                                       | 1228  |
| PSE2260 | (1179) | GCTCGGTGCTGCCCTACGGGGCCACCTCCACACTGCTGGCCGGAGACTCG  |                                       |       |
|         |        |                                                     | PSE2260 seq splicing                  | (351) |
|         |        | GCTCGGTGCTGCCCTACGGGGCCACCTCCACACTGCTGGCCGGAGACTCG  |                                       |       |
|         |        | 1229                                                |                                       | 1278  |
| PSE2260 | (1229) | GACTCCCAGGAGGAAGCGCACGGCAAGCTCGTGCTCTGGTCGGGCCTCCG  |                                       |       |
|         |        |                                                     | PSE2260 seq splicing                  | (401) |
|         |        | GACTCCCAGGAGGAAGCGCACGGCAAGCTCGTGCTCTGGTCGGGCCTCCG  |                                       |       |
|         |        | 1279                                                |                                       | 1328  |
| PSE2260 | (1279) | GAATGCCCCCGCTGCTGGGCAGTGATCCAGCCCCTGCTGTGTGCCGTAT   |                                       |       |
|         |        |                                                     | PSE2260 seq splicing                  | (451) |
|         |        | GAATGCCCCCGCTGCTGGGCAGTGATCCAGCCCCTGCTGTGTGCCGTAT   |                                       |       |
|         |        | 1329                                                |                                       | 1378  |
| PSE2260 | (1329) | ACATGCCCAAGTGTGAGAATGACCGGGTGGAGCTGCCAGCCGTACCCTC   |                                       |       |



PSE2260 seq splicing (501)

ACATGCCCAAGTGTGAGAATGACCGGGTGGAGCTGCCAGCCGTACCCTC  
1379 1428

PSE2260 (1379) TGCCAGGCCACCCGAGGCCCTGTGCCATCGTGGAGAGGGAGCGGGGCTG  
PSE2260 seq splicing (551)

TGCCAGGCCACCCGAGGCCCTGTGCCATCGTGGAGAGGGAGCGGGGCTG  
1429 1478

PSE2260 (1429) GCCTGACTTCCTGCGCTGCACTCCTGACCGCTTCCCTGAAGGCTGCACGA  
PSE2260 seq splicing (601)

GCCTGACTTCCTGCGCTGCACTCCTGACCGCTTCCCTGAAGGCTGCACGA  
1479 1528

PSE2260 (1479) ATGAGGTGCAGAACATCAAGTTCAACAGTTCAGGCCAGTGCGAAGTGCCC  
PSE2260 seq splicing (651)

ATGAGGTGCAGAACATCAAGTTCAACAGTTCAGGCCAGTGCGAAGTGCCC  
1529 1578

PSE2260 (1529) TTGGTTCGGACAGACAACCCCAAGAGCTGGTACGAGGACGTGGAGGGCTG  
PSE2260 seq splicing (701)

TTGGTTCGGACAGACAACCCCAAGAGCTGGTACGAGGACGTGGAGGGCTG  
1579 1628

PSE2260 (1579) CGGCATCCAGTGCCAGAACCCGCTCTTCACAGAGGCTGAGCACCAGGACA  
PSE2260 seq splicing (751)

CGGCATCCAGTGCCAGAACCCGCTCTTCACAGAGGCTGAGCACCAGGACA  
1629 1678

PSE2260 (1629) TGCGCAGCTACATCGCGGCCTTCGGGGCCGTACGGGCCTCTGCACGCTC  
PSE2260 seq splicing (801)

TGCGCAGCTACATCGCGGCCTTCGGGGCCGTACGGGCCTCTGCACGCTC  
1679 1728

PSE2260 (1679) TTCACCCTGGCCACATTCGTGGCTGACTGGCGGAACTCGAATCGCTACCC  
PSE2260 seq splicing (851)

TTCACCCTGGCCACATTCGTGGCTGACTGGCGGAACTCGAATCGCTACCC  
1729 1778

PSE2260 (1729) TGCTGTTATTCTTCTTCTACGTCAATGCGTGCTTCTTTGTGGGCAGCATTG  
PSE2260 seq splicing (901)

TGCTGTTATTCTTCTTCTACGTCAATGCGTGCTTCTTTGTGGGCAGCATTG  
1779 1828

PSE2260 (1779) GCTGGCTGGCCCAGTTCATGGATGGTGCCCGCCGAGAGATCGTCTGCCGT  
PSE2260 seq splicing (951)

GCTGGCTGGCCCAGTTCATGGATGGTGCCCGCCGAGAGATCGTCTGCCGT  
1829 1878

PSE2260 (1829) GCAGATGGCACCATGAGGCTTGGGGAGCCACCTCCAATGAGACTCTGTC  
PSE2260 seq splicing (1001)

GCAGATGGCACCATGAGGCTTGGGGAGCCACCTCCAATGAGACTCTGTC  
1879 1928

PSE2260 (1879) CTGCGTCATCATCTTTGTCATCGTGTACTACGCCCTGATGGCTGGTGTGG

PSE2260 seq splicing (1051)  
CTGCGTCATCATCTTTGTCATCGTGTACTACGCCCTGATGGCTGGTGTGG  
1929 1978  
PSE2260 (1929) FTTGGTTTGTGGTCCCTCACCTATGCCTGGCACACTTCCTTCAAAGCCCTG  
PSE2260 seq splicing (1101)  
FTTGGTTTGTGGTCCCTCACCTATGCCTGGCACACTTCCTTCAAAGCCCTG  
1979 2028  
PSE2260 (1979) GGCACCACCTACCAGCCTCTCTCGGGCAAGACCTCCTACTTCCACCTGCT  
PSE2260 seq splicing (1151)  
GGCACCACCTACCAGCCTCTCTCGGGCAAGACCTCCTACTTCCACCTGCT  
2029 2078  
PSE2260 (2029) CACCTGGTCACTCCCCTTTGTCCTCACTGTGGCAATCCTTGCTGTGGCGC  
PSE2260 seq splicing (1201)  
CACCTGGTCACTCCCCTTTGTCCTCACTGTGGCAATCCTTGCTGTGGCGC  
2079 2128  
PSE2260 (2079) AGGTGGATGGGGACTCTGTGAGTGGGATTGTTTGTGGGCTACAAGAAC  
PSE2260 seq splicing (1251)  
AGGTGGATGGGGACTCTGTGAGTGGGATTGTTTGTGGGCTACAAGAAC  
2129 2178  
PSE2260 (2129) TACCGATACCGTGCGGGCTTCGTGCTGGCCCAATCGGCCTGGTGCTCAT  
PSE2260 seq splicing (1301)  
TACCGATACCGTGCGGGCTTCGTGCTGGCCCAATCGGCCTGGTGCTCAT  
2179 2228  
PSE2260 (2179) CGTGGGAGGCTACTTCCTCATCCGAGGAGTCATGACTCTGTTCTCCATCA  
PSE2260 seq splicing (1351)  
CGTGGGAGGCTACTTCCTCATCCGAGGAGTCATGACTCTGTTCTCCATCA  
2229 2278  
PSE2260 (2229) AGAGCAACCACCCCGGGCTGCTGAGTGAGAAGGCTGCCAGCAAGATCAAC  
PSE2260 seq splicing (1401)  
AGAGCAACCACCCCGGGCTGCTGAGTGAGAAGGCTGCCAGCAAGATCAAC  
2279 2328  
PSE2260 (2279) GAGACCATGCTGCGCCTGGGCATTTTTGGCTTCCTGGCCTTTGGCTTTGT  
PSE2260 seq splicing (1451)  
GAGACCATGCTGCGCCTGGGCATTTTTGGCTTCCTGGCCTTTGGCTTTGT  
2329 2378  
PSE2260 (2329) GCTCATTACCTTCAGCTGCCACTTCTACGACTTCTTCAACCAGGCTGAGT  
PSE2260 seq splicing (1501)  
GCTCATTACCTTCAGCTGCCACTTCTACGACTTCTTCAACCAGGCTGAGT  
2379 2428  
PSE2260 (2379) GGGAGCGCAGCTTCCGGGACTATGTGCTATGTCAGGCCAATGTGACCATC  
PSE2260 seq splicing (1551)  
GGGAGCGCAGCTTCCGGGACTATGTGCTATGTCAGGCCAATGTGACCATC  
2429 2478  
PSE2260 (2429) GGGCTGCCACCAAGCAGCCATCCCTGACTGTGAGATCAAGAATCGCCC

PSE2260 seq splicing (1601)  
GGGCTGCCACCAAGCAGCCATCCCTGACTGTGAGATCAAGAATCGCCC  
2479 2528  
PSE2260 (2479) GAGCCTTCTGGTGGAGAAGATCAACCTGTTTGCCATGTTTGGAAGTGGCA  
PSE2260 seq splicing (1651)  
GAGCCTTCTGGTGGAGAAGATCAACCTGTTTGCCATGTTTGGAAGTGGCA  
2529 2578  
PSE2260 (2529) TCGCCATGAGCACCTGGGTCTGGACCAAGGCCACGCTGCTCATCTGGAGG  
PSE2260 seq splicing (1701)  
TCGCCATGAGCACCTGGGTCTGGACCAAGGCCACGCTGCTCATCTGGAGG  
2579 2628  
PSE2260 (2579) CGTACCTGGTGCAGGTTGACTGGGCAGAGTGACGATGAGCCAAAGCGGAT  
PSE2260 seq splicing (1751)  
CGTACCTGGTGCAGGTTGACTGGGCAGAGTGACGATGAGCCAAAGCGGAT  
2629 2678  
PSE2260 (2629) CAAGAAGAGCAAGATGATTGCCAAGGCCTTCTCTAAGCGGCACGAGCTCC  
PSE2260 seq splicing (1801)  
CAAGAAGAGCAAGATGATTGCCAAGGCCTTCTCTAAGCGGCACGAGCTCC  
2679 2728  
PSE2260 (2679) TGCAGAACCAGGCCAGGAGCTGTCC TTCAGCATGCACACTGTGTCCCAC  
PSE2260 seq splicing (1851)  
TGCAGAACCAGGCCAGGAGCTGTCC TTCAGCATGCACACTGTGTCCCAC  
2729 2778  
PSE2260 (2729) GACGGGCCCGTGGCGGGCTTGGCCTTTGACCTCAATGAGCCCTCAGCTGA  
PSE2260 seq splicing (1901)  
GACGGGCCCGTGGCGGGCTTGGCCTTTGACCTCAATGAGCCCTCAGCTGA  
2779 2828  
PSE2260 (2779) TGTCTCCTCTGCCTGGGCCAGCATGTCACCAAGATGGTGGCTCGGAGAG  
PSE2260 seq splicing (1951)  
TGTCTCCTCTGCCTGGGCCAGCATGTCACCAAGATGGTGGCTCGGAGAG  
2829 2878  
PSE2260 (2829) GAGCCATACTGCCCCAGGATATTTCTGTCACCCCTGTGGCAACTCCAGTG  
PSE2260 seq splicing (2001)  
GAGCCATACTGCCCCAGGATATTTCTGTCACCCCTGTGGCAACTCCAGTG  
2879 2928  
PSE2260 (2879) CCCCCAGAGGAACAAGCCAACCTGTGGCTGGTTGAGGCAGAGATCTCCCC  
PSE2260 seq splicing (2051)  
CCCCCAGAGGAACAAGCCAACCTGTGGCTGGTTGAGGCAGAGATCTCCCC  
2929 2978  
PSE2260 (2929) AGAGCTGCAGAAGCGCCTGGGCCGGAAGAAGAAGAGGAGGAAGAGGAAGA  
PSE2260 seq splicing (2101)  
AGAGCTGCAGAAGCGCCTGGGCCGGAAGAAGAAGAGGAGGAAGAGGAAGA  
2979 3028  
PSE2260 (2979) AGGAGGTGTGCCGCTGGCGCCGCCCTGAGCTTACCCCCCTGCCCT

PSE2260 seq splicing (2151)

AGGAGGTGTGCCCGCTGGCGCCGCCCCCTGAGCTTCACCCCCCTGCCCT  
3029 3078

PSE2260 (3029) GCCCCAGTACCATTCTCGACTGCCTCAGCTGCCCGGCAGAAATGCCT  
PSE2260 seq splicing (2201)

GCCCCAGTACCATTCTCGACTGCCTCAGCTGCCCGGCAGAAATGCCT  
3079 3128

PSE2260 (3079) GGTGGCTGCAGGTGCCTGGGGAGCTGGGGACTCTTGCCGACAGGGAGCGT  
PSE2260 seq splicing (2251)

GGTGGCTGCAGGTGCCTGGGGAGCTGGGGACTCTTGCCGACAGGGAGCGT  
3129 3178

PSE2260 (3129) GGACCCTGGTCTCCAACCCATTCTGCCAGAGCCCAGTCCCCCTCAGGAT  
PSE2260 seq splicing (2301)

GGACCCTGGTCTCCAACCCATTCTGCCAGAGCCCAGTCCCCCTCAGGAT  
3179 3228

PSE2260 (3179) CCATTTCTGCCAGTGCACCGGCCCGCGTGGCATGGGCTCATGGCCGCC  
PSE2260 seq splicing (2351)

CCATTTCTGCCAGTGCACCGGCCCGCGTGGCATGGGCTCATGGCCGCC  
3229 3278

PSE2260 (3229) ACAGGGCCTGGGGCCTATTCACTCCCGCACCAACCTGATGGACACAGAAC  
PSE2260 seq splicing (2401)

ACAGGGCCTGGGGCCTATTCACTCCCGCACCAACCTGATGGACACAGAAC  
3279 3328

PSE2260 (3279) TCATGGATGCAGACTCGGACTTCGAACAAAACTCATCTCAGAAGAGGAT  
PSE2260 seq splicing (2451)

TCATGGATGCAGACTCGGACTTCGAACAAAACTCATCTCAGAAGAGGAT  
3329 3378

PSE2260 (3329) CTGGACTACAAGGATGACGATGACAAGGATTACAAAGACGACGATGATAA  
PSE2260 seq splicing (2501)

CTGGACTACAAGGATGACGATGACAAGGATTACAAAGACGACGATGATAA  
3379 3428

PSE2260 (3379) GGACTATAAGGATGATGACGACAAATAATCTAGAGGGCCCGTTTAAACCC  
PSE2260 seq splicing (2551)

GGACTATAAGGATGATGACGACAAATAATCTAGAGGGCCCGTTTAAACCC  
3429 3475

PSE2260 (3429) GCTGATCAGCCTCGACTGTGCCTTCTAGTTGCCAGCCATCTGTTGTT  
PSE2260 seq splicing (2601)

GCTGATCAGCCTCGACTGTGCCTTCTAGTTGCCAGCCATCTGTTGTT

Smo W281C:

|         |        |                                                     |                                       |       |
|---------|--------|-----------------------------------------------------|---------------------------------------|-------|
|         |        | 829                                                 |                                       | 878   |
| PSE2261 | (829)  | CTAGAGAACCCACTGCTTACTGGCTTATCGAAATTAATACGACTCACTAT  |                                       |       |
|         |        |                                                     | PSE2261 seq splicing                  | (1)   |
|         |        | CTAGAGAACCCACTGCTTACTGGCTTATCGAAATTAATACGACTCACTAT  |                                       |       |
|         |        | 879                                                 |                                       | 928   |
| PSE2261 | (879)  | AGGGAGACCCAAGCTGGCTAGCGTTTAAACTTAAGCTTGGTACCGAGCTC  |                                       |       |
|         |        |                                                     | PSE2261 seq splicing                  | (51)  |
|         |        | AGGGAGACCCAAGCTGGCTAGCGTTTAAACTTAAGCTTGGTACCGAGCTC  |                                       |       |
|         |        | 929                                                 |                                       | 978   |
| PSE2261 | (929)  | GGATCCGCCACG                                        | ATGGCCGCTGCCCGCCAGCGCGGGGGCCGGAGCTCCC |       |
|         |        |                                                     | PSE2261 seq splicing                  | (101) |
|         |        | GGATCCGCCACG                                        | ATGGCCGCTGCCCGCCAGCGCGGGGGCCGGAGCTCCC |       |
|         |        | 979                                                 |                                       | 1028  |
| PSE2261 | (979)  | GCTCCTGGGGCTGCTGCTGCTGCTGCTGCTGGGGGACCCGGGCCGGGGG   |                                       |       |
|         |        |                                                     | PSE2261 seq splicing                  | (151) |
|         |        | GCTCCTGGGGCTGCTGCTGCTGCTGCTGCTGGGGGACCCGGGCCGGGGG   |                                       |       |
|         |        | 1029                                                |                                       | 1078  |
| PSE2261 | (1029) | CGGCCTCGAGCGGGAACGCGACCGGGCCTGGGCCTCGGAGCGCGGGCGGG  |                                       |       |
|         |        |                                                     | PSE2261 seq splicing                  | (201) |
|         |        | CGGCCTCGAGCGGGAACGCGACCGGGCCTGGGCCTCGGAGCGCGGGCGGG  |                                       |       |
|         |        | 1079                                                |                                       | 1128  |
| PSE2261 | (1079) | AGCGCGAGGAGGAGCGCGGGCGGTGACTGGCCCTCCGCCGCCGCTGAGCCA |                                       |       |
|         |        |                                                     | PSE2261 seq splicing                  | (251) |
|         |        | AGCGCGAGGAGGAGCGCGGGCGGTGACTGGCCCTCCGCCGCCGCTGAGCCA |                                       |       |
|         |        | 1129                                                |                                       | 1178  |
| PSE2261 | (1129) | CTGCGGCCGGGCTGCCCCCTGCGAGCCGCTGCGCTACAACGTGTGCCTGG  |                                       |       |
|         |        |                                                     | PSE2261 seq splicing                  | (301) |
|         |        | CTGCGGCCGGGCTGCCCCCTGCGAGCCGCTGCGCTACAACGTGTGCCTGG  |                                       |       |
|         |        | 1179                                                |                                       | 1228  |
| PSE2261 | (1179) | GCTCGGTGCTGCCCTACGGGGCCACCTCCACACTGCTGGCCGGAGACTCG  |                                       |       |
|         |        |                                                     | PSE2261 seq splicing                  | (351) |
|         |        | GCTCGGTGCTGCCCTACGGGGCCACCTCCACACTGCTGGCCGGAGACTCG  |                                       |       |
|         |        | 1229                                                |                                       | 1278  |
| PSE2261 | (1229) | GACTCCCAGGAGGAAGCGCACGGCAAGCTCGTGCTCTGGTCGGGCCTCCG  |                                       |       |
|         |        |                                                     | PSE2261 seq splicing                  | (401) |
|         |        | GACTCCCAGGAGGAAGCGCACGGCAAGCTCGTGCTCTGGTCGGGCCTCCG  |                                       |       |
|         |        | 1279                                                |                                       | 1328  |
| PSE2261 | (1279) | GAATGCCCCCGCTGCTGGGCAGTGATCCAGCCCCTGCTGTGTGCCGTAT   |                                       |       |
|         |        |                                                     | PSE2261 seq splicing                  | (451) |
|         |        | GAATGCCCCCGCTGCTGGGCAGTGATCCAGCCCCTGCTGTGTGCCGTAT   |                                       |       |
|         |        | 1329                                                |                                       | 1378  |
| PSE2261 | (1329) | ACATGCCCAAGTGTGAGAATGACCGGGTGGAGCTGCCAGCCGTACCCTC   |                                       |       |

PSE2261 seq splicing (501)

ACATGCCCAAGTGTGAGAATGACCGGGTGGAGCTGCCAGCCGTACCCTC  
1379 1428

PSE2261 (1379) TGCCAGGCCACCCGAGGCCCTGTGCCATCGTGGAGAGGGAGCGGGGCTG  
PSE2261 seq splicing (551)

TGCCAGGCCACCCGAGGCCCTGTGCCATCGTGGAGAGGGAGCGGGGCTG  
1429 1478

PSE2261 (1429) GCCTGACTTCCTGCGCTGCACTCCTGACCGCTTCCCTGAAGGCTGCACGA  
PSE2261 seq splicing (601)

GCCTGACTTCCTGCGCTGCACTCCTGACCGCTTCCCTGAAGGCTGCACGA  
1479 1528

PSE2261 (1479) ATGAGGTGCAGAACATCAAGTTCAACAGTTCAGGCCAGTGCGAAGTGCCC  
PSE2261 seq splicing (651)

ATGAGGTGCAGAACATCAAGTTCAACAGTTCAGGCCAGTGCGAAGTGCCC  
1529 1578

PSE2261 (1529) TTGGTTCGGACAGACAACCCCAAGAGCTGGTACGAGGACGTGGAGGGCTG  
PSE2261 seq splicing (701)

TTGGTTCGGACAGACAACCCCAAGAGCTGGTACGAGGACGTGGAGGGCTG  
1579 1628

PSE2261 (1579) CGGCATCCAGTGCCAGAACCCGCTCTTCACAGAGGCTGAGCACCAGGACA  
PSE2261 seq splicing (751)

CGGCATCCAGTGCCAGAACCCGCTCTTCACAGAGGCTGAGCACCAGGACA  
1629 1678

PSE2261 (1629) TGCACAGCTACATCGCGGCCTTCGGGGCCGTACGGGCCTCTGCACGCTC  
PSE2261 seq splicing (801)

TGCACAGCTACATCGCGGCCTTCGGGGCCGTACGGGCCTCTGCACGCTC  
1679 1728

PSE2261 (1679) TTCACCCTGGCCACATTCGTGGCTGACTGGCGGAACTCGAATCGCTACCC  
PSE2261 seq splicing (851)

TTCACCCTGGCCACATTCGTGGCTGACTGGCGGAACTCGAATCGCTACCC  
1729 1778

PSE2261 (1729) TGCTGTTATTCTCTTCTACGTCAATGCGTGCTTCTTTGTGGGCAGCATTG  
PSE2261 seq splicing (901)

TGCTGTTATTCTCTTCTACGTCAATGCGTGCTTCTTTGTGGGCAGCATTG  
1779 1828

PSE2261 (1779) GCTGCTGGCCAGTTCATGGATGGTGCCCGCCGAGAGATCGTCTGCCGT  
PSE2261 seq splicing (951)

GCTGCTGGCCAGTTCATGGATGGTGCCCGCCGAGAGATCGTCTGCCGT  
1829 1878

PSE2261 (1829) GCAGATGGCACCATGAGGCTTGGGGAGCCACCTCCAATGAGACTCTGTC  
PSE2261 seq splicing (1001)

GCAGATGGCACCATGAGGCTTGGGGAGCCACCTCCAATGAGACTCTGTC  
1879 1928

PSE2261 (1879) CTGCGTCATCATCTTTGTATCGTGTACTACGCCCTGATGGCTGGTGTGG

PSE2261 seq splicing (1051)

CTGCGTCATCATCTTTGTCATCGTGTACTACGCCCTGATGGCTGGTGTGG  
1929 1978

PSE2261 (1929) FTTGGTTTGTGGTCCCTCACCTATGCCTGGCACACTTCCTTCAAAGCCCTG  
PSE2261 seq splicing (1101)

FTTGGTTTGTGGTCCCTCACCTATGCCTGGCACACTTCCTTCAAAGCCCTG  
1979 2028

PSE2261 (1979) GGCACCACCTACCAGCCTCTCTCGGGCAAGACCTCCTACTTCCACCTGCT  
PSE2261 seq splicing (1151)

GGCACCACCTACCAGCCTCTCTCGGGCAAGACCTCCTACTTCCACCTGCT  
2029 2078

PSE2261 (2029) CACCTGGTCACTCCCCTTTGTCCTCACTGTGGCAATCCTTGCTGTGGCGC  
PSE2261 seq splicing (1201)

CACCTGGTCACTCCCCTTTGTCCTCACTGTGGCAATCCTTGCTGTGGCGC  
2079 2128

PSE2261 (2079) AGGTGGATGGGGACTCTGTGAGTGGGATTGTTTGTGGGCTACAAGAAC  
PSE2261 seq splicing (1251)

AGGTGGATGGGGACTCTGTGAGTGGGATTGTTTGTGGGCTACAAGAAC  
2129 2178

PSE2261 (2129) TACCGATACCGTGCGGGCTTCGTGCTGGCCCAATCGGCCTGGTGCTCAT  
PSE2261 seq splicing (1301)

TACCGATACCGTGCGGGCTTCGTGCTGGCCCAATCGGCCTGGTGCTCAT  
2179 2228

PSE2261 (2179) CGTGGGAGGCTACTTCCTCATCCGAGGAGTCATGACTCTGTTCTCCATCA  
PSE2261 seq splicing (1351)

CGTGGGAGGCTACTTCCTCATCCGAGGAGTCATGACTCTGTTCTCCATCA  
2229 2278

PSE2261 (2229) AGAGCAACCACCCCGGGCTGCTGAGTGAGAAGGCTGCCAGCAAGATCAAC  
PSE2261 seq splicing (1401)

AGAGCAACCACCCCGGGCTGCTGAGTGAGAAGGCTGCCAGCAAGATCAAC  
2279 2328

PSE2261 (2279) GAGACCATGCTGCGCCTGGGCATTTTTGGCTTCCTGGCCTTTGGCTTTGT  
PSE2261 seq splicing (1451)

GAGACCATGCTGCGCCTGGGCATTTTTGGCTTCCTGGCCTTTGGCTTTGT  
2329 2378

PSE2261 (2329) GCTCATTACCTTCAGCTGCCACTTCTACGACTTCTTCAACCAGGCTGAGT  
PSE2261 seq splicing (1501)

GCTCATTACCTTCAGCTGCCACTTCTACGACTTCTTCAACCAGGCTGAGT  
2379 2428

PSE2261 (2379) GGGAGCGCAGCTTCCGGGACTATGTGCTATGTCAGGCCAATGTGACCATC  
PSE2261 seq splicing (1551)

GGGAGCGCAGCTTCCGGGACTATGTGCTATGTCAGGCCAATGTGACCATC  
2429 2478

PSE2261 (2429) GGGCTGCCACCAAGCAGCCATCCCTGACTGTGAGATCAAGAATCGCCC

PSE2261 seq splicing (1601)

GGGCTGCCACCAAGCAGCCATCCCTGACTGTGAGATCAAGAATCGCCC  
2479 2528

PSE2261 (2479) GAGCCTTCTGGTGGAGAAGATCAACCTGTTTGCCATGTTTGGAAGTGGCA  
PSE2261 seq splicing (1651)

GAGCCTTCTGGTGGAGAAGATCAACCTGTTTGCCATGTTTGGAAGTGGCA  
2529 2578

PSE2261 (2529) TCGCCATGAGCACCTGGGTCTGGACCAAGGCCACGCTGCTCATCTGGAGG  
PSE2261 seq splicing (1701)

TCGCCATGAGCACCTGGGTCTGGACCAAGGCCACGCTGCTCATCTGGAGG  
2579 2628

PSE2261 (2579) CGTACCTGGTGCAGGTTGACTGGGCAGAGTGACGATGAGCCAAAGCGGAT  
PSE2261 seq splicing (1751)

CGTACCTGGTGCAGGTTGACTGGGCAGAGTGACGATGAGCCAAAGCGGAT  
2629 2678

PSE2261 (2629) CAAGAAGAGCAAGATGATTGCCAAGGCCTTCTCTAAGCGGCACGAGCTCC  
PSE2261 seq splicing (1801)

CAAGAAGAGCAAGATGATTGCCAAGGCCTTCTCTAAGCGGCACGAGCTCC  
2679 2728

PSE2261 (2679) TGCAGAACCAGGCCAGGAGCTGTCC TTCAGCATGCACACTGTGTCCCAC  
PSE2261 seq splicing (1851)

TGCAGAACCAGGCCAGGAGCTGTCC TTCAGCATGCACACTGTGTCCCAC  
2729 2778

PSE2261 (2729) GACGGGCCCGTGGCGGGCTTGGCCTTTGACCTCAATGAGCCCTCAGCTGA  
PSE2261 seq splicing (1901)

GACGGGCCCGTGGCGGGCTTGGCCTTTGACCTCAATGAGCCCTCAGCTGA  
2779 2828

PSE2261 (2779) TGTCTCCTCTGCCTGGGCCAGCATGTCACCAAGATGGTGGCTCGGAGAG  
PSE2261 seq splicing (1951)

TGTCTCCTCTGCCTGGGCCAGCATGTCACCAAGATGGTGGCTCGGAGAG  
2829 2878

PSE2261 (2829) GAGCCATACTGCCCCAGGATATTTCTGTCACCCCTGTGGCAACTCCAGTG  
PSE2261 seq splicing (2001)

GAGCCATACTGCCCCAGGATATTTCTGTCACCCCTGTGGCAACTCCAGTG  
2879 2928

PSE2261 (2879) CCCCCAGAGGAACAAGCCAACCTGTGGCTGGTTGAGGCAGAGATCTCCCC  
PSE2261 seq splicing (2051)

CCCCCAGAGGAACAAGCCAACCTGTGGCTGGTTGAGGCAGAGATCTCCCC  
2929 2978

PSE2261 (2929) AGAGCTGCAGAAGCGCCTGGGCCGGAAGAAGAAGAGGAGGAAGAGGAAGA  
PSE2261 seq splicing (2101)

AGAGCTGCAGAAGCGCCTGGGCCGGAAGAAGAAGAGGAGGAAGAGGAAGA  
2979 3028

PSE2261 (2979) AGGAGGTGTGCCGCTGGCGCCGCCCTGAGCTTCACCCCTGCCCCT



PSE2261 seq splicing (2151)

AGGAGGTGTGCCCGCTGGCGCCGCCCCCTGAGCTTCACCCCCCTGCCCT  
3029 3078

PSE2261 (3029) GCCCCCAGTACCATTCTCGACTGCCTCAGCTGCCCCGGCAGAAATGCCT  
PSE2261 seq splicing (2201)

GCCCCAGTACCATTCTCGACTGCCTCAGCTGCCCCGGCAGAAATGCCT  
3079 3128

PSE2261 (3079) GGTGGCTGCAGGTGCCTGGGGAGCTGGGGACTCTTGCCGACAGGGAGCGT  
PSE2261 seq splicing (2251)

GGTGGCTGCAGGTGCCTGGGGAGCTGGGGACTCTTGCCGACAGGGAGCGT  
3129 3178

PSE2261 (3129) GGACCCTGGTCTCCAACCCATTCTGCCAGAGCCCAGTCCCCCTCAGGAT  
PSE2261 seq splicing (2301)

GGACCCTGGTCTCCAACCCATTCTGCCAGAGCCCAGTCCCCCTCAGGAT  
3179 3228

PSE2261 (3179) CCATTTCTGCCAGTGCACCGGCCCGTGGCATGGGCTCATGGCCGCC  
PSE2261 seq splicing (2351)

CCATTTCTGCCAGTGCACCGGCCCGTGGCATGGGCTCATGGCCGCC  
3229 3278

PSE2261 (3229) ACAGGGCCTGGGGCCTATTCACTCCCGCACCAACCTGATGGACACAGAAC  
PSE2261 seq splicing (2401)

ACAGGGCCTGGGGCCTATTCACTCCCGCACCAACCTGATGGACACAGAAC  
3279 3328

PSE2261 (3279) TCATGGATGCAGACTCGGACTTCGAACAAAACCTCATCTCAGAAGAGGAT  
PSE2261 seq splicing (2451)

TCATGGATGCAGACTCGGACTTCGAACAAAACCTCATCTCAGAAGAGGAT  
3329 3378

PSE2261 (3329) CTGGACTACAAGGATGACGATGACAAGGATTACAAAGACGACGATGATAA  
PSE2261 seq splicing (2501)

CTGGACTACAAGGATGACGATGACAAGGATTACAAAGACGACGATGATAA  
3379 3428

PSE2261 (3379) GGACTATAAGGATGATGACGACAAATAATCTAGAGGGCCCGTTTAAACCC  
PSE2261 seq splicing (2551)

GGACTATAAGGATGATGACGACAAATAATCTAGAGGGCCCGTTTAAACCC  
3429 3475

PSE2261 (3429) GCTGATCAGCCTCGACTGTGCCTTCTAGTTGCCAGCCATCTGTTGTT  
PSE2261 seq splicing (2601)

GCTGATCAGCCTCGACTGTGCCTTCTAGTTGCCAGCCATCTGTTGTT

Smo L412F:

829 878  
PSE2262 (829) CTAGAGAACCCACTGCTTACTGGCTTATCGAAATTAATACGACTCACTAT  
PSE2262 seq splicing (1)  
CTAGAGAACCCACTGCTTACTGGCTTATCGAAATTAATACGACTCACTAT

879 928  
PSE2262 (879) AGGGAGACCCAAGCTGGCTAGCGTTTAAACTTAAGCTTGGTACCGAGCTC  
PSE2262 seq splicing (51)  
AGGGAGACCCAAGCTGGCTAGCGTTTAAACTTAAGCTTGGTACCGAGCTC

929 978  
PSE2262 (929) SGATCCGCCACCATGGCCGCTGCCCGCCAGCGCGGGGGCCGGAGCTCCC  
PSE2262 seq splicing (101)  
SGATCCGCCACCATGGCCGCTGCCCGCCAGCGCGGGGGCCGGAGCTCCC

979 1028  
PSE2262 (979) GCTCCTGGGGCTGCTGCTGCTGCTGCTGCTGGGGGACCCGGGCCGGGGG  
PSE2262 seq splicing (151)  
GCTCCTGGGGCTGCTGCTGCTGCTGCTGCTGGGGGACCCGGGCCGGGGG

1029 1078  
PSE2262 (1029) CGGCCTCGAGCGGGAACGCGACCGGGCCTGGGCCTCGGAGCGCGGGCGGG  
PSE2262 seq splicing (201)  
CGGCCTCGAGCGGGAACGCGACCGGGCCTGGGCCTCGGAGCGCGGGCGGG

1079 1128  
PSE2262 (1079) AGCGCGAGGAGGAGCGCGGGCGGTGACTGGCCCTCCGCCCGCGCTGAGCCA  
PSE2262 seq splicing (251)  
AGCGCGAGGAGGAGCGCGGGCGGTGACTGGCCCTCCGCCCGCGCTGAGCCA

1129 1178  
PSE2262 (1129) CTGCGGCCGGGCTGCCCCCTGCGAGCCGCTGCGCTACAACGTGTGCCTGG  
PSE2262 seq splicing (301)  
CTGCGGCCGGGCTGCCCCCTGCGAGCCGCTGCGCTACAACGTGTGCCTGG

1179 1228  
PSE2262 (1179) GCTCGGTGCTGCCCTACGGGGCCACCTCCACACTGCTGGCCGGAGACTCG  
PSE2262 seq splicing (351)  
GCTCGGTGCTGCCCTACGGGGCCACCTCCACACTGCTGGCCGGAGACTCG

1229 1278  
PSE2262 (1229) GACTCCCAGGAGGAAGCGCACGGCAAGCTCGTGCTCTGGTCGGGCCTCCG  
PSE2262 seq splicing (401)  
GACTCCCAGGAGGAAGCGCACGGCAAGCTCGTGCTCTGGTCGGGCCTCCG

1279 1328  
PSE2262 (1279) GAATGCCCCCGCTGCTGGGCAGTGATCCAGCCCCTGCTGTGTGCCGTAT  
PSE2262 seq splicing (451)  
GAATGCCCCCGCTGCTGGGCAGTGATCCAGCCCCTGCTGTGTGCCGTAT

1329 1378  
PSE2262 (1329) ACATGCCCAAGTGTGAGAATGACCGGGTGGAGCTGCCAGCCGTACCCTC

PSE2262 seq splicing (501)

ACATGCCCAAGTGTGAGAATGACCGGGTGGAGCTGCCAGCCGTACCCTC  
1379 1428

PSE2262 (1379) TGCCAGGCCACCCGAGGCCCTGTGCCATCGTGGAGAGGGAGCGGGGCTG  
PSE2262 seq splicing (551)

TGCCAGGCCACCCGAGGCCCTGTGCCATCGTGGAGAGGGAGCGGGGCTG  
1429 1478

PSE2262 (1429) GCCTGACTTCCTGCGCTGCACTCCTGACCGCTTCCCTGAAGGCTGCACGA  
PSE2262 seq splicing (601)

GCCTGACTTCCTGCGCTGCACTCCTGACCGCTTCCCTGAAGGCTGCACGA  
1479 1528

PSE2262 (1479) ATGAGGTGCAGAACATCAAGTTCAACAGTTCAGGCCAGTGCGAAGTGCCC  
PSE2262 seq splicing (651)

ATGAGGTGCAGAACATCAAGTTCAACAGTTCAGGCCAGTGCGAAGTGCCC  
1529 1578

PSE2262 (1529) TTGGTTCGGACAGACAACCCCAAGAGCTGGTACGAGGACGTGGAGGGCTG  
PSE2262 seq splicing (701)

TTGGTTCGGACAGACAACCCCAAGAGCTGGTACGAGGACGTGGAGGGCTG  
1579 1628

PSE2262 (1579) CGGCATCCAGTGCCAGAACCCGCTCTTCACAGAGGCTGAGCACCAGGACA  
PSE2262 seq splicing (751)

CGGCATCCAGTGCCAGAACCCGCTCTTCACAGAGGCTGAGCACCAGGACA  
1629 1678

PSE2262 (1629) TGCACAGCTACATCGCGGCCTTCGGGGCCGTACGGGCCTCTGCACGCTC  
PSE2262 seq splicing (801)

TGCACAGCTACATCGCGGCCTTCGGGGCCGTACGGGCCTCTGCACGCTC  
1679 1728

PSE2262 (1679) TTCACCCTGGCCACATTCGTGGCTGACTGGCGGAACTCGAATCGCTACCC  
PSE2262 seq splicing (851)

TTCACCCTGGCCACATTCGTGGCTGACTGGCGGAACTCGAATCGCTACCC  
1729 1778

PSE2262 (1729) TGCTGTTATTCTTCTTCTACGTCAATGCGTGCTTCTTTGTGGGCAGCATTG  
PSE2262 seq splicing (901)

TGCTGTTATTCTTCTTCTACGTCAATGCGTGCTTCTTTGTGGGCAGCATTG  
1779 1828

PSE2262 (1779) GCTGGCTGGCCCAGTTCATGGATGGTGCCCGCCGAGAGATCGTCTGCCGT  
PSE2262 seq splicing (951)

GCTGGCTGGCCCAGTTCATGGATGGTGCCCGCCGAGAGATCGTCTGCCGT  
1829 1878

PSE2262 (1829) GCAGATGGCACCATGAGGCTTGGGGAGCCACCTCCAATGAGACTCTGTC  
PSE2262 seq splicing (1001)

GCAGATGGCACCATGAGGCTTGGGGAGCCACCTCCAATGAGACTCTGTC  
1879 1928

PSE2262 (1879) CTGCGTCATCATCTTTGTCATCGTGTACTACGCCCTGATGGCTGGTGTGG

PSE2262 seq splicing (1051)

CTGCGTCATCATCTTTGTCATCGTGTACTACGCCCTGATGGCTGGTGTGG  
1929 1978

PSE2262 (1929) FTTGGTTTGTGGTCCTCACCTATGCCTGGCACACTTCCTTCAAAGCCCTG  
PSE2262 seq splicing (1101)

FTTGGTTTGTGGTCCTCACCTATGCCTGGCACACTTCCTTCAAAGCCCTG  
1979 2028

PSE2262 (1979) GGCACCACCTACCAGCCTCTCTCGGGCAAGACCTCCTACTTCCACCTGCT  
PSE2262 seq splicing (1151)

GGCACCACCTACCAGCCTCTCTCGGGCAAGACCTCCTACTTCCACCTGCT  
2029 2078

PSE2262 (2029) CACCTGGTCACTCCCCTTTGTCCTCACTGTGGCAATCCTTGCTGTGGCGC  
PSE2262 seq splicing (1201)

CACCTGGTCACTCCCCTTTGTCCTCACTGTGGCAATCCTTGCTGTGGCGC  
2079 2128

PSE2262 (2079) AGGTGGATGGGGACTCTGTGAGTGGGATTGTTTGTGGGCTACAAGAAC  
PSE2262 seq splicing (1251)

AGGTGGATGGGGACTCTGTGAGTGGGATTGTTTGTGGGCTACAAGAAC  
2129 2178

PSE2262 (2129) TACCGATACCGTGC GGGCTTCGTGCTGGCCCAATCGGCCTGGTGTTTCAT  
PSE2262 seq splicing (1301)

TACCGATACCGTGC GGGCTTCGTGCTGGCCCAATCGGCCTGGTGTTTCAT  
2179 2228

PSE2262 (2179) CGTGGGAGGCTACTTCCTCATCCGAGGAGTCATGACTCTGTTCTCCATCA  
PSE2262 seq splicing (1351)

CGTGGGAGGCTACTTCCTCATCCGAGGAGTCATGACTCTGTTCTCCATCA  
2229 2278

PSE2262 (2229) AGAGCAACCACCCCGGGCTGCTGAGTGAGAAGGCTGCCAGCAAGATCAAC  
PSE2262 seq splicing (1401)

AGAGCAACCACCCCGGGCTGCTGAGTGAGAAGGCTGCCAGCAAGATCAAC  
2279 2328

PSE2262 (2279) GAGACCATGCTGCGCCTGGGCATTTTTGGCTTCCTGGCCTTTGGCTTTGT  
PSE2262 seq splicing (1451)

GAGACCATGCTGCGCCTGGGCATTTTTGGCTTCCTGGCCTTTGGCTTTGT  
2329 2378

PSE2262 (2329) GCTCATTACCTTCAGCTGCCACTTCTACGACTTCTTCAACCAGGCTGAGT  
PSE2262 seq splicing (1501)

GCTCATTACCTTCAGCTGCCACTTCTACGACTTCTTCAACCAGGCTGAGT  
2379 2428

PSE2262 (2379) GGGAGCGCAGCTTCCGGGACTATGTGCTATGTCAGGCCAATGTGACCATC  
PSE2262 seq splicing (1551)

GGGAGCGCAGCTTCCGGGACTATGTGCTATGTCAGGCCAATGTGACCATC  
2429 2478

PSE2262 (2429) GGGCTGCCACCAAGCAGCCATCCCTGACTGTGAGATCAAGAATCGCCC

PSE2262 seq splicing (1601)

GGGCTGCCACCAAGCAGCCCATCCCTGACTGTGAGATCAAGAATCGCCC  
2479 2528

PSE2262 (2479) GAGCCTTCTGGTGGAGAAGATCAACCTGTTTGCCATGTTTGGAAGTGGCA  
PSE2262 seq splicing (1651)

GAGCCTTCTGGTGGAGAAGATCAACCTGTTTGCCATGTTTGGAAGTGGCA  
2529 2578

PSE2262 (2529) TCGCCATGAGCACCTGGGTCTGGACCAAGGCCACGCTGCTCATCTGGAGG  
PSE2262 seq splicing (1701)

TCGCCATGAGCACCTGGGTCTGGACCAAGGCCACGCTGCTCATCTGGAGG  
2579 2628

PSE2262 (2579) CGTACCTGGTGCAGGTTGACTGGGCAGAGTGACGATGAGCCAAAGCGGAT  
PSE2262 seq splicing (1751)

CGTACCTGGTGCAGGTTGACTGGGCAGAGTGACGATGAGCCAAAGCGGAT  
2629 2678

PSE2262 (2629) CAAGAAGAGCAAGATGATTGCCAAGGCCTTCTCTAAGCGGCACGAGCTCC  
PSE2262 seq splicing (1801)

CAAGAAGAGCAAGATGATTGCCAAGGCCTTCTCTAAGCGGCACGAGCTCC  
2679 2728

PSE2262 (2679) TGCAGAACCAGGCCAGGAGCTGTCC TTCAGCATGCACACTGTGTCCCAC  
PSE2262 seq splicing (1851)

TGCAGAACCAGGCCAGGAGCTGTCC TTCAGCATGCACACTGTGTCCCAC  
2729 2778

PSE2262 (2729) GACGGGCCCGTGGCGGGCTTGGCCTTTGACCTCAATGAGCCCTCAGCTGA  
PSE2262 seq splicing (1901)

GACGGGCCCGTGGCGGGCTTGGCCTTTGACCTCAATGAGCCCTCAGCTGA  
2779 2828

PSE2262 (2779) TGTCTCCTCTGCCTGGGCCAGCATGTCACCAAGATGGTGGCTCGGAGAG  
PSE2262 seq splicing (1951)

TGTCTCCTCTGCCTGGGCCAGCATGTCACCAAGATGGTGGCTCGGAGAG  
2829 2878

PSE2262 (2829) GAGCCATACTGCCCCAGGATATTTCTGTCACCCCTGTGGCAACTCCAGTG  
PSE2262 seq splicing (2001)

GAGCCATACTGCCCCAGGATATTTCTGTCACCCCTGTGGCAACTCCAGTG  
2879 2928

PSE2262 (2879) CCCCCAGAGGAACAAGCCAACCTGTGGCTGGTTGAGGCAGAGATCTCCCC  
PSE2262 seq splicing (2051)

CCCCCAGAGGAACAAGCCAACCTGTGGCTGGTTGAGGCAGAGATCTCCCC  
2929 2978

PSE2262 (2929) AGAGCTGCAGAAGCGCCTGGGCCGGAAGAAGAAGAGGAGGAAGAGGAAGA  
PSE2262 seq splicing (2101)

AGAGCTGCAGAAGCGCCTGGGCCGGAAGAAGAAGAGGAGGAAGAGGAAGA  
2979 3028

PSE2262 (2979) AGGAGGTGTGCCGCTGGCGCCGCCCCCTGAGCTTCACCCCCCTGCCCT

PSE2262 seq splicing (2151)

AGGAGGTGTGCCCGCTGGCGCCGCCCCCTGAGCTTCACCCCCCTGCCCT  
3029 3078

PSE2262 (3029) GCCCCCAGTACCATTCCCTCGACTGCCTCAGCTGCCCCGGCAGAAATGCCT  
PSE2262 seq splicing (2201)

GCCCCAGTACCATTCCCTCGACTGCCTCAGCTGCCCCGGCAGAAATGCCT  
3079 3128

PSE2262 (3079) GGTGGCTGCAGGTGCCTGGGGAGCTGGGGACTCTTGCCGACAGGGAGCGT  
PSE2262 seq splicing (2251)

GGTGGCTGCAGGTGCCTGGGGAGCTGGGGACTCTTGCCGACAGGGAGCGT  
3129 3178

PSE2262 (3129) GGACCCTGGTCTCCAACCCATTCTGCCAGAGCCCAGTCCCCCTCAGGAT  
PSE2262 seq splicing (2301)

GGACCCTGGTCTCCAACCCATTCTGCCAGAGCCCAGTCCCCCTCAGGAT  
3179 3228

PSE2262 (3179) CCATTTCTGCCAGTGCACCGGCCCCCGTGGCATGGGCTCATGGCCGCC  
PSE2262 seq splicing (2351)

CCATTTCTGCCAGTGCACCGGCCCCCGTGGCATGGGCTCATGGCCGCC  
3229 3278

PSE2262 (3229) ACAGGGCCTGGGGCCTATTCACTCCCGCACCAACCTGATGGACACAGAAC  
PSE2262 seq splicing (2401)

ACAGGGCCTGGGGCCTATTCACTCCCGCACCAACCTGATGGACACAGAAC  
3279 3328

PSE2262 (3279) TCATGGATGCAGACTCGGACTTCGAACAAAACTCATCTCAGAAGAGGAT  
PSE2262 seq splicing (2451)

TCATGGATGCAGACTCGGACTTCGAACAAAACTCATCTCAGAAGAGGAT  
3329 3378

PSE2262 (3329) CTGGACTACAAGGATGACGATGACAAGGATTACAAAGACGACGATGATAA  
PSE2262 seq splicing (2501)

CTGGACTACAAGGATGACGATGACAAGGATTACAAAGACGACGATGATAA  
3379 3428

PSE2262 (3379) SGACTATAAGGATGATGACGACAAATAATCTAGAGGGCCCGTTTAAACCC  
PSE2262 seq splicing (2551)

SGACTATAAGGATGATGACGACAAATAATCTAGAGGGCCCGTTTAAACCC  
3429 3449

PSE2262 (3429) GCTGATCAGCCTCGACTGTGC  
PSE2262 seq splicing (2601) GCTGATCAGCCTCGACTGTGC

Smo F460L:

829 878  
PSE2263 (829) CTAGAGAACCCACTGCTTACTGGCTTATCGAAATTAATACGACTCACTAT  
PSE2263 seq splicing (1)  
CTAGAGAACCCACTGCTTACTGGCTTATCGAAATTAATACGACTCACTAT

879 928  
PSE2263 (879) AGGGAGACCCAAGCTGGCTAGCGTTTAAACTTAAGCTTGGTACCGAGCTC  
PSE2263 seq splicing (51)  
AGGGAGACCCAAGCTGGCTAGCGTTTAAACTTAAGCTTGGTACCGAGCTC

929 978  
PSE2263 (929) SGATCCGCCACCATGGCCGCTGCCCGCCAGCGCGGGGGCCGGAGCTCCC  
PSE2263 seq splicing (101)  
SGATCCGCCACCATGGCCGCTGCCCGCCAGCGCGGGGGCCGGAGCTCCC

979 1028  
PSE2263 (979) GCTCCTGGGGCTGCTGCTGCTGCTGCTGCTGGGGGACCCGGGCCGGGGG  
PSE2263 seq splicing (151)  
GCTCCTGGGGCTGCTGCTGCTGCTGCTGCTGGGGGACCCGGGCCGGGGG

1029 1078  
PSE2263 (1029) CGGCCTCGAGCGGGAACGCGACCGGGCCTGGGCCTCGGAGCGCGGGCGGG  
PSE2263 seq splicing (201)  
CGGCCTCGAGCGGGAACGCGACCGGGCCTGGGCCTCGGAGCGCGGGCGGG

1079 1128  
PSE2263 (1079) AGCGCGAGGAGGAGCGCGGGCGGTGACTGGCCCTCCGCCCGCGCTGAGCCA  
PSE2263 seq splicing (251)  
AGCGCGAGGAGGAGCGCGGGCGGTGACTGGCCCTCCGCCCGCGCTGAGCCA

1129 1178  
PSE2263 (1129) CTGCGGCCGGGCTGCCCCCTGCGAGCCGCTGCGCTACAACGTGTGCCTGG  
PSE2263 seq splicing (301)  
CTGCGGCCGGGCTGCCCCCTGCGAGCCGCTGCGCTACAACGTGTGCCTGG

1179 1228  
PSE2263 (1179) GCTCGGTGCTGCCCTACGGGGCCACCTCCACACTGCTGGCCGGAGACTCG  
PSE2263 seq splicing (351)  
GCTCGGTGCTGCCCTACGGGGCCACCTCCACACTGCTGGCCGGAGACTCG

1229 1278  
PSE2263 (1229) GACTCCCAGGAGGAAGCGCACGGCAAGCTCGTGCTCTGGTCGGGCCTCCG  
PSE2263 seq splicing (401)  
GACTCCCAGGAGGAAGCGCACGGCAAGCTCGTGCTCTGGTCGGGCCTCCG

1279 1328  
PSE2263 (1279) GAATGCCCCCGCTGCTGGGCAGTGATCCAGCCCCTGCTGTGTGCCGTAT  
PSE2263 seq splicing (451)  
GAATGCCCCCGCTGCTGGGCAGTGATCCAGCCCCTGCTGTGTGCCGTAT

1329 1378  
PSE2263 (1329) ACATGCCCAAGTGTGAGAATGACCGGGTGGAGCTGCCAGCCGTACCCTC

PSE2263 seq splicing (501)

ACATGCCCAAGTGTGAGAATGACCGGGTGGAGCTGCCAGCCGTACCCTC  
1379 1428

PSE2263 (1379) TGCCAGGCCACCCGAGGCCCTGTGCCATCGTGGAGAGGGAGCGGGGCTG  
PSE2263 seq splicing (551)

TGCCAGGCCACCCGAGGCCCTGTGCCATCGTGGAGAGGGAGCGGGGCTG  
1429 1478

PSE2263 (1429) GCCTGACTTCCTGCGCTGCACTCCTGACCGCTTCCCTGAAGGCTGCACGA  
PSE2263 seq splicing (601)

GCCTGACTTCCTGCGCTGCACTCCTGACCGCTTCCCTGAAGGCTGCACGA  
1479 1528

PSE2263 (1479) ATGAGGTGCAGAACATCAAGTTCAACAGTTCAGGCCAGTGCGAAGTGCCC  
PSE2263 seq splicing (651)

ATGAGGTGCAGAACATCAAGTTCAACAGTTCAGGCCAGTGCGAAGTGCCC  
1529 1578

PSE2263 (1529) TTGGTTCGGACAGACAACCCCAAGAGCTGGTACGAGGACGTGGAGGGCTG  
PSE2263 seq splicing (701)

TTGGTTCGGACAGACAACCCCAAGAGCTGGTACGAGGACGTGGAGGGCTG  
1579 1628

PSE2263 (1579) CGGCATCCAGTGCCAGAACCCGCTCTTCACAGAGGCTGAGCACCAGGACA  
PSE2263 seq splicing (751)

CGGCATCCAGTGCCAGAACCCGCTCTTCACAGAGGCTGAGCACCAGGACA  
1629 1678

PSE2263 (1629) TGCACAGCTACATCGCGGCCTTCGGGGCCGTACGGGCCTCTGCACGCTC  
PSE2263 seq splicing (801)

TGCACAGCTACATCGCGGCCTTCGGGGCCGTACGGGCCTCTGCACGCTC  
1679 1728

PSE2263 (1679) TTCACCCCTGGCCACATTCGTGGCTGACTGGCGGAACTCGAATCGCTACCC  
PSE2263 seq splicing (851)

TTCACCCCTGGCCACATTCGTGGCTGACTGGCGGAACTCGAATCGCTACCC  
1729 1778

PSE2263 (1729) TGCTGTTATTCTCTTCTACGTCAATGCGTGCTTCTTTGTGGGCAGCATTG  
PSE2263 seq splicing (901)

TGCTGTTATTCTCTTCTACGTCAATGCGTGCTTCTTTGTGGGCAGCATTG  
1779 1828

PSE2263 (1779) GCTGGCTGGCCCAGTTCATGGATGGTGCCCGCCGAGAGATCGTCTGCCGT  
PSE2263 seq splicing (951)

GCTGGCTGGCCCAGTTCATGGATGGTGCCCGCCGAGAGATCGTCTGCCGT  
1829 1878

PSE2263 (1829) GCAGATGGCACCATGAGGCTTGGGGAGCCCACCTCCAATGAGACTCTGTG  
PSE2263 seq splicing (1001)

GCAGATGGCACCATGAGGCTTGGGGAGCCCACCTCCAATGAGACTCTGTG  
1879 1928

PSE2263 (1879) CTGCGTCATCATCTTTGTCATCGTGTACTACGCCCTGATGGCTGGTGTGG



PSE2263 seq splicing (1051)

CTGCGTCATCATCTTTGTCATCGTGTACTACGCCCTGATGGCTGGTGTGG  
1929 1978

PSE2263 (1929) FTTGGTTTGTGGTCCCTCACCTATGCCTGGCACACTTCCTTCAAAGCCCTG  
PSE2263 seq splicing (1101)

FTTGGTTTGTGGTCCCTCACCTATGCCTGGCACACTTCCTTCAAAGCCCTG  
1979 2028

PSE2263 (1979) GGCACCACCTACCAGCCTCTCTCGGGCAAGACCTCCTACTTCCACCTGCT  
PSE2263 seq splicing (1151)

GGCACCACCTACCAGCCTCTCTCGGGCAAGACCTCCTACTTCCACCTGCT  
2029 2078

PSE2263 (2029) CACCTGGTCACTCCCCTTTGTCCTCACTGTGGCAATCCTTGCTGTGGCGC  
PSE2263 seq splicing (1201)

CACCTGGTCACTCCCCTTTGTCCTCACTGTGGCAATCCTTGCTGTGGCGC  
2079 2128

PSE2263 (2079) AGGTGGATGGGGACTCTGTGAGTGGGATTGTTTGTGGGCTACAAGAAC  
PSE2263 seq splicing (1251)

AGGTGGATGGGGACTCTGTGAGTGGGATTGTTTGTGGGCTACAAGAAC  
2129 2178

PSE2263 (2129) TACCGATACCGTGCGGGCTTCGTGCTGGCCCAATCGGCCTGGTGCTCAT  
PSE2263 seq splicing (1301)

TACCGATACCGTGCGGGCTTCGTGCTGGCCCAATCGGCCTGGTGCTCAT  
2179 2228

PSE2263 (2179) CGTGGGAGGCTACTTCCTCATCCGAGGAGTCATGACTCTGTTCTCCATCA  
PSE2263 seq splicing (1351)

CGTGGGAGGCTACTTCCTCATCCGAGGAGTCATGACTCTGTTCTCCATCA  
2229 2278

PSE2263 (2229) AGAGCAACCACCCCGGGCTGCTGAGTGAGAAGGCTGCCAGCAAGATCAAC  
PSE2263 seq splicing (1401)

AGAGCAACCACCCCGGGCTGCTGAGTGAGAAGGCTGCCAGCAAGATCAAC  
2279 2328

PSE2263 (2279) GAGACCATGCTGCGCCTGGGCATTTTTGGCTTCCTGGCCTTGGGCTTTGT  
PSE2263 seq splicing (1451)

GAGACCATGCTGCGCCTGGGCATTTTTGGCTTCCTGGCCTTGGGCTTTGT  
2329 2378

PSE2263 (2329) GCTCATTACCTTCAGCTGCCACTTCTACGACTTCTTCAACCAGGCTGAGT  
PSE2263 seq splicing (1501)

GCTCATTACCTTCAGCTGCCACTTCTACGACTTCTTCAACCAGGCTGAGT  
2379 2428

PSE2263 (2379) GGGAGCGCAGCTTCCGGGACTATGTGCTATGTCAGGCCAATGTGACCATC  
PSE2263 seq splicing (1551)

GGGAGCGCAGCTTCCGGGACTATGTGCTATGTCAGGCCAATGTGACCATC  
2429 2478

PSE2263 (2429) GGGCTGCCACCAAGCAGCCATCCCTGACTGTGAGATCAAGAATCGCCC

PSE2263 seq splicing (1601)

PSE2263 (2479) GGGCTGCCACCAAGCAGCCCATCCCTGACTGTGAGATCAAGAATCGCCC  
2479 2528

PSE2263 seq splicing (1651)

PSE2263 (2529) GAGCCTTCTGGTGGAGAAGATCAACCTGTTTGCCATGTTTGGAAGTGGCA  
2529 2578

PSE2263 seq splicing (1701)

PSE2263 (2579) TCGCCATGAGCACCTGGGTCTGGACCAAGGCCACGCTGCTCATCTGGAGG  
2579 2628

PSE2263 seq splicing (1751)

PSE2263 (2629) CGTACCTGGTGCAGGTTGACTGGGCAGAGTGACGATGAGCCAAAGCGGAT  
2629 2678

PSE2263 seq splicing (1801)

PSE2263 (2679) CAAGAAGAGCAAGATGATTGCCAAGGCCTTCTCTAAGCGGCACGAGCTCC  
2679 2728

PSE2263 seq splicing (1851)

PSE2263 (2729) TGCAGAACCCAGGCCAGGAGCTGTCC TTCAGCATGCACACTGTGTCCCAC  
2729 2778

PSE2263 seq splicing (1901)

PSE2263 (2779) GACGGGCCCCGTGGCGGGCTTGGCCTTTGACCTCAATGAGCCCTCAGCTGA  
2779 2828

PSE2263 seq splicing (1951)

PSE2263 (2829) TGTCTCCTCTGCCTGGGCCAGCATGTCACCAAGATGGTGGCTCGGAGAG  
2829 2878

PSE2263 seq splicing (2001)

PSE2263 (2879) GAGCCATACTGCCCCAGGATATTTCTGTCACCCCTGTGGCAACTCCAGTG  
2879 2928

PSE2263 seq splicing (2051)

PSE2263 (2929) CCCCCAGAGGAACAAGCCAACCTGTGGCTGGTTGAGGCAGAGATCTCCCC  
2929 2978

PSE2263 seq splicing (2101)

PSE2263 (2979) AGAGCTGCAGAAGCGCCTGGGCCGGAAGAAGAAGAGGAGGAAGAGGAAGA  
2979 3028

PSE2263 (2979) AGGAGGTGTGCCCGCTGGCGCCGCCCCCTGAGCTTCACCCCCCTGCCCT

PSE2263 seq splicing (2151)

AGGAGGTGTGCCCGCTGGCGCCGCCCCCTGAGCTTCACCCCCCTGCCCT  
3029 3078

PSE2263 (3029) GCCCCAGTACCATTCTCGACTGCCTCAGCTGCCCGGCAGAAATGCCT  
PSE2263 seq splicing (2201)

GCCCCAGTACCATTCTCGACTGCCTCAGCTGCCCGGCAGAAATGCCT  
3079 3128

PSE2263 (3079) GGTGGCTGCAGGTGCCTGGGGAGCTGGGGACTCTTGCCGACAGGGAGCGT  
PSE2263 seq splicing (2251)

GGTGGCTGCAGGTGCCTGGGGAGCTGGGGACTCTTGCCGACAGGGAGCGT  
3129 3178

PSE2263 (3129) GGACCCTGGTCTCCAACCCATTCTGCCAGAGCCCAGTCCCCCTCAGGAT  
PSE2263 seq splicing (2301)

GGACCCTGGTCTCCAACCCATTCTGCCAGAGCCCAGTCCCCCTCAGGAT  
3179 3228

PSE2263 (3179) CCATTTCTGCCAGTGCACCGGCCCGTGGCATGGGCTCATGGCCGCC  
PSE2263 seq splicing (2351)

CCATTTCTGCCAGTGCACCGGCCCGTGGCATGGGCTCATGGCCGCC  
3229 3278

PSE2263 (3229) ACAGGGCCTGGGGCCTATTCACTCCCGCACCAACCTGATGGACACAGAAC  
PSE2263 seq splicing (2401)

ACAGGGCCTGGGGCCTATTCACTCCCGCACCAACCTGATGGACACAGAAC  
3279 3328

PSE2263 (3279) TCATGGATGCAGACTCGGACTTCGAACAAAACATCTCAGAAGAGGAT  
PSE2263 seq splicing (2451)

TCATGGATGCAGACTCGGACTTCGAACAAAACATCTCAGAAGAGGAT  
3329 3378

PSE2263 (3329) CTGGACTACAAGGATGACGATGACAAGGATTACAAAGACGACGATGATAA  
PSE2263 seq splicing (2501)

CTGGACTACAAGGATGACGATGACAAGGATTACAAAGACGACGATGATAA  
3379 3428

PSE2263 (3379) GGACTATAAGGATGATGACGACAAATAATCTAGAGGGCCCGTTTAAACCC  
PSE2263 seq splicing (2551)

GGACTATAAGGATGATGACGACAAATAATCTAGAGGGCCCGTTTAAACCC  
3429 3475

PSE2263 (3429) GCTGATCAGCCTCGACTGTGCCTTCTAGTTGCCAGCCATCTGTTGTT  
PSE2263 seq splicing (2601)

GCTGATCAGCCTCGACTGTGCCTTCTAGTTGCCAGCCATCTGTTGTT
